# Supplementary material for: Spatially resolved multi-omics highlights cell-specific metabolic remodeling and interactions in gastric cancer
Source: Nat Commun. 2023 May 10;14:2692. doi: 10.1038/s41467-023-38360-5 (PMC10172194; doi:10.1038/s41467-023-38360-5)
Supplement: Supplementary file 1 — Supplementary Information [file 41467_2023_38360_MOESM1_ESM.pdf]

## Supplementary information

### Spatially resolved multi-omics highlights cell-specific metabolic remodeling and interactions in gastric cancer

Chenglong Sun<sup>1,2,3,†</sup>, Anqiang Wang<sup>4,†</sup>, Yanhe Zhou<sup>1,†</sup>, Panpan Chen<sup>2,3</sup>, Xiangyi Wang<sup>1</sup>, Jianpeng Huang<sup>1</sup>, Jiamin Gao<sup>1</sup>, Xiao Wang<sup>2,3</sup>, Liebo Shu<sup>5</sup>, Jiawei Lu<sup>5</sup>, Wentao Dai<sup>6,7\*</sup>, Zhaode Bu<sup>4\*</sup>, Jiafu Ji<sup>4\*</sup>, Jiuming He<sup>1,8\*</sup>

<sup>1</sup> State Key Laboratory of Bioactive Substance and Function of Natural Medicines, Institute of Materia Medica, Chinese Academy of Medical Sciences and Peking Union Medical College, Beijing 100050, China.

<sup>2</sup> Key Laboratory for Applied Technology of Sophisticated Analytical Instruments of Shandong Province, Shandong Analysis and Test Center, Qilu University of Technology (Shandong Academy of Sciences), Jinan 250014, China.

<sup>3</sup> Key Laboratory for Natural Active Pharmaceutical Constituents Research in Universities of Shandong Province, School of Pharmaceutical Sciences, Qilu University of Technology (Shandong Academy of Sciences), Jinan, 250014, China.

<sup>4</sup> Gastrointestinal Cancer Center, Key Laboratory of Carcinogenesis and Translational Research (Ministry of Education), Peking University Cancer Hospital and Institute, Beijing 100142, China.

<sup>5</sup> Shanghai Luming Biological Technology co.Ltd, Shanghai 201102, China.

<sup>6</sup> NHC Key Lab of Reproduction Regulation (Shanghai Institute for Biomedical and Pharmaceutical Technologies) & Shanghai Engineering Research Center of Pharmaceutical Translation, Fudan University, Shanghai 200080, China.

<sup>7</sup> Shanghai Key Laboratory of Gastric Neoplasms, Department of General Surgery, Shanghai Institute of Digestive Surgery, Ruijin Hospital, Shanghai Jiao Tong University School of Medicine, Shanghai 200025, China.

<sup>8</sup> NMPA Key Laboratory of safety research and evaluation of Innovative Drug, Institute of Materia Medica, Chinese Academy of Medical Sciences and Peking Union Medical College, Beijing 100050, China.

† These authors contributed equally: Chenglong Sun, Anqiang Wang, Yanhe Zhou.

\* These authors jointly supervised this work: Wentao Dai, [dwent\\_job@163.com](mailto:dwent_job@163.com); Zhaode Bu, [buzhaode@cjcrcn.org](mailto:buzhaode@cjcrcn.org); Jiafu Ji, [jjiafu@hsc.pku.edu.cn](mailto:jjiafu@hsc.pku.edu.cn); Jiuming He, [hejiuming@imm.ac.cn](mailto:hejiuming@imm.ac.cn)

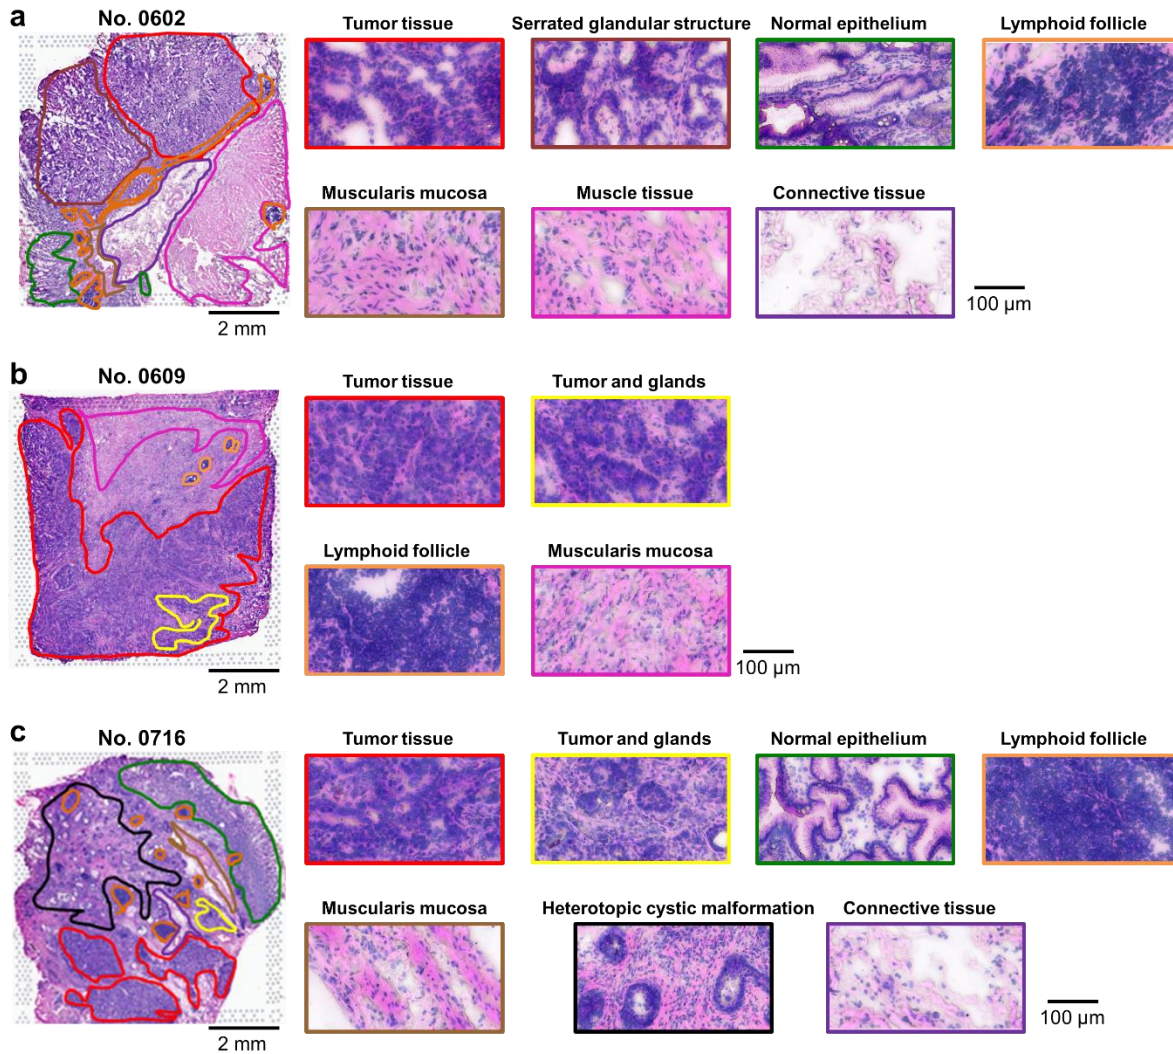

**Supplementary Figure 1 | H&E stain image of gastric cancer tissue section from different patients. a,** Typical H&E staining image of gastric cancer tissue for patients “No.0602”. **b,** Typical H&E staining image of gastric cancer tissue for patients “No.0609”. **c,** Typical H&E staining image of gastric cancer tissue for patients “No.0716”. scale bar = 2 mm for whole tissue sections, scale bar = 100  $\mu\text{m}$  for magnified image. The experiment was repeated three times.

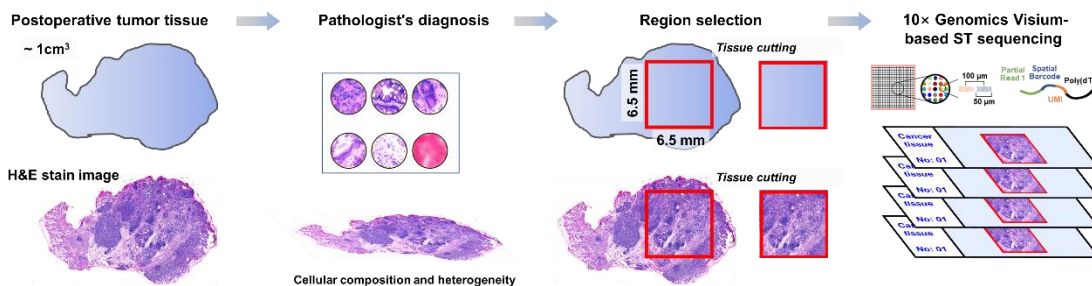

**Supplementary Figure 2 | The process of selecting scan area for 10x Genomics sequencing.**

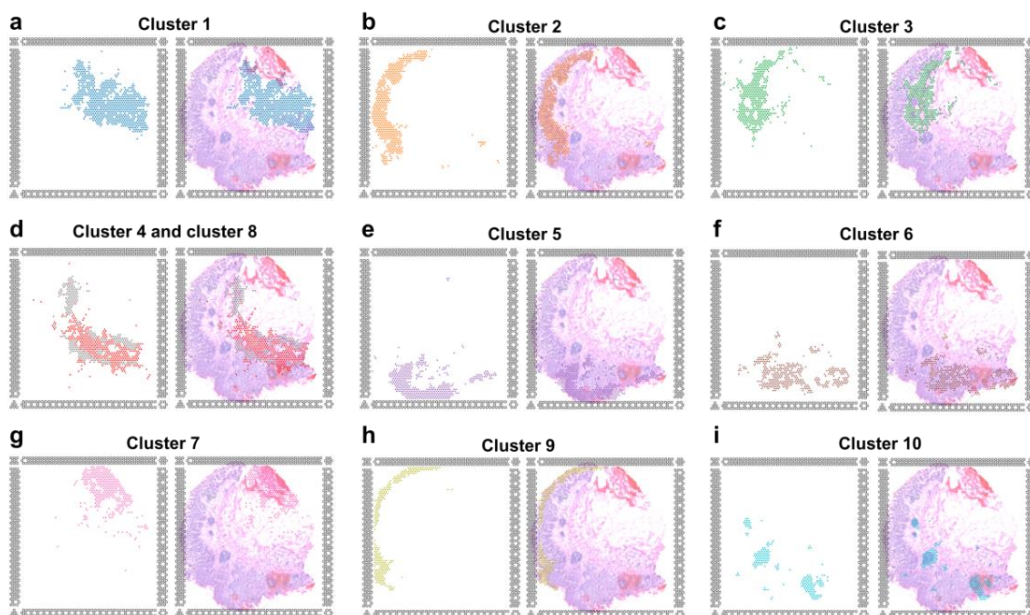

**Supplementary Figure 3 | Visium array spots colored by graph-based clustering algorithm for gastric cancer tissue section.** **a**, Graph-based Visium array spots of cluster 1. **b**, Graph-based Visium array spots of cluster 2. **c**, Graph-based Visium array spots of cluster 3. **d**, Graph-based Visium array spots of cluster 4 and cluster 8. **e**, Graph-based Visium array spots of cluster 5. **f**, Graph-based Visium array spots of cluster 6. **g**, Graph-based Visium array spots of cluster 7. **h**, Graph-based Visium array spots of cluster 9. **i**, Graph-based Visium array spots of cluster 10.

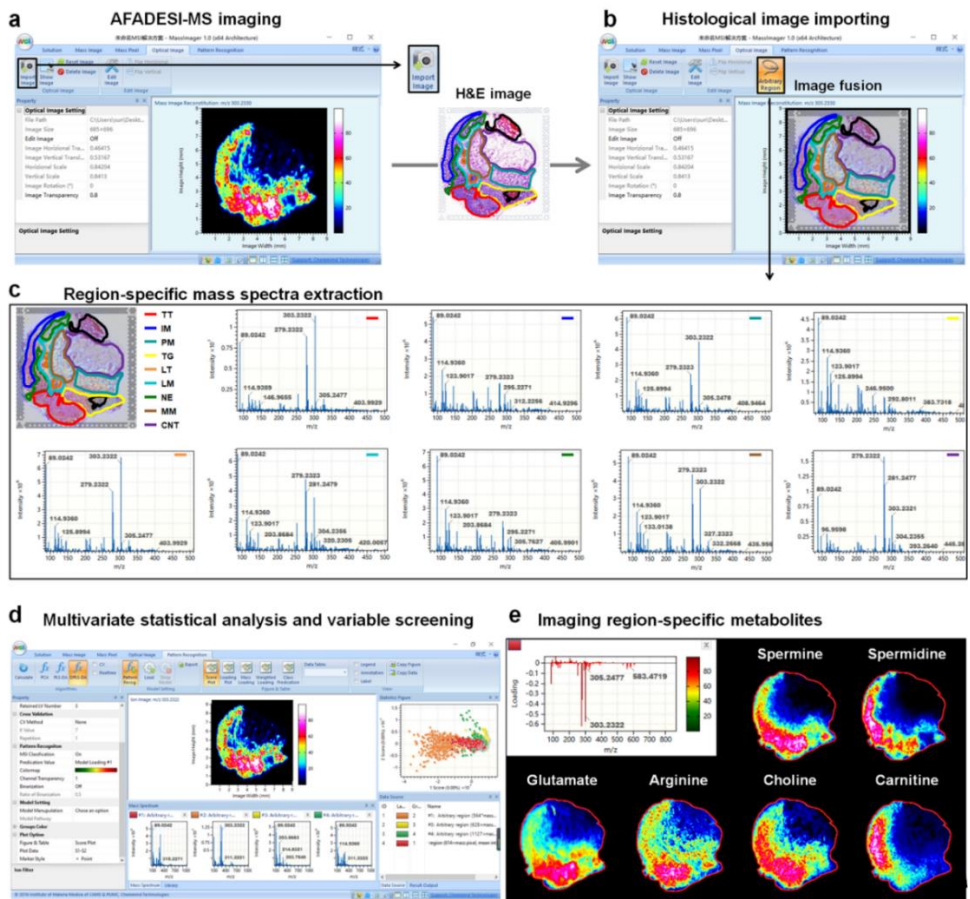

**Supplementary Figure 4 | Spots-labeled H&E image was imported into AFADSI-MSI software MassImager for image fusion and feature metabolites screening. a,** The operation interface of MassImager software. **b,** Import histological staining images into MassImager software. **c,** Extraction of AFADSI MS data from different tissue regions. **d,** *In situ* multivariate statistical analysis. **e,** MS images of screened region-specific metabolites.

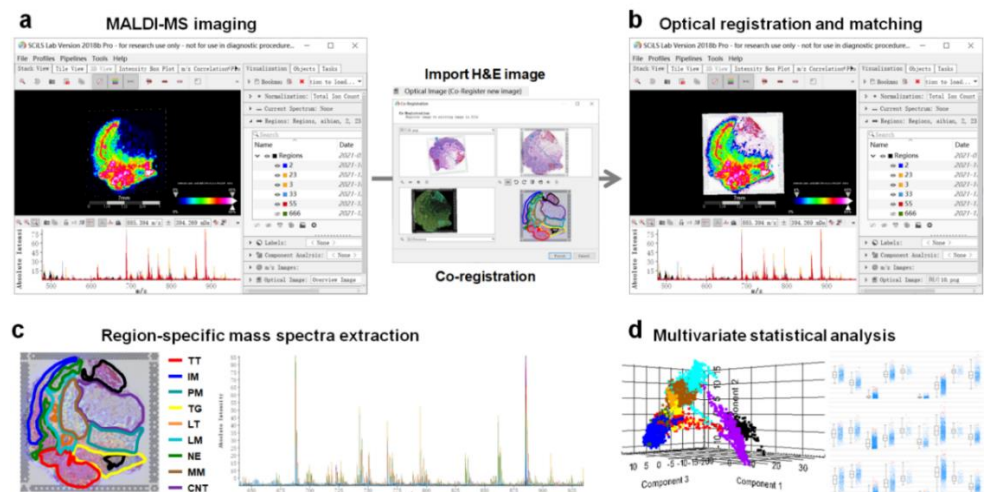

**Supplementary Figure 5 | Spots-labeled H&E image was imported into MALDI-MSI software SCiLS Lab for image fusion and feature lipids screening. a,** The operation interface of SCiLS Lab software. **b,** Import histological staining images into SCiLS Lab software. **c,** Extraction of MALDI MS data from different tissue regions. **d,** *In situ* multivariate statistical analysis.

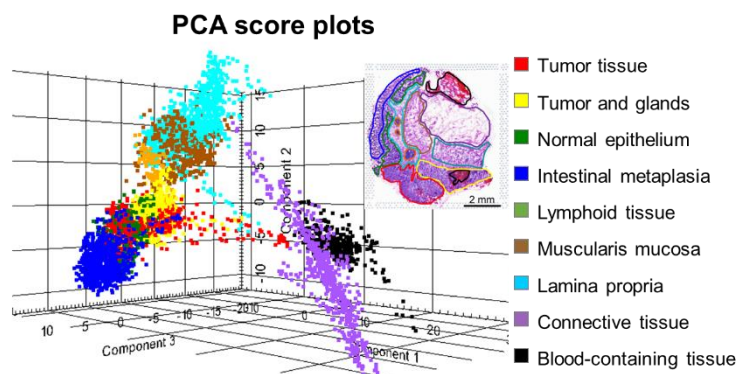

**Supplementary Figure 6 | PCA score plots for different gastric cancer tissue regions based on the metabolite and lipid profiles.**

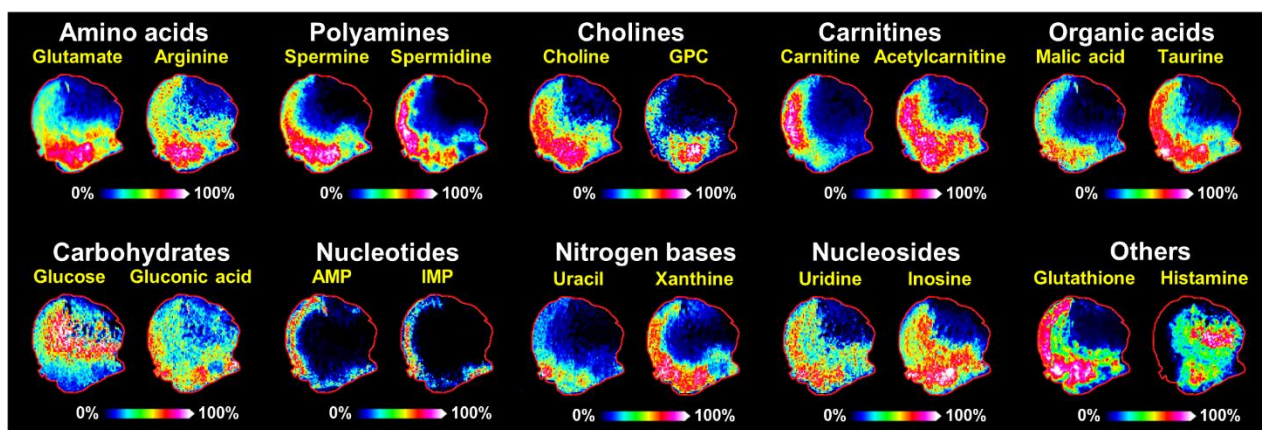

**Supplementary Figure 7 | Representative metabolites that imaged by AFADESI-MSI based platform. GPC:** glycerophosphorylcholine, AMP: adenosine monophosphate, IMP: inosine monophosphate, intensity in colour scale is relative value.

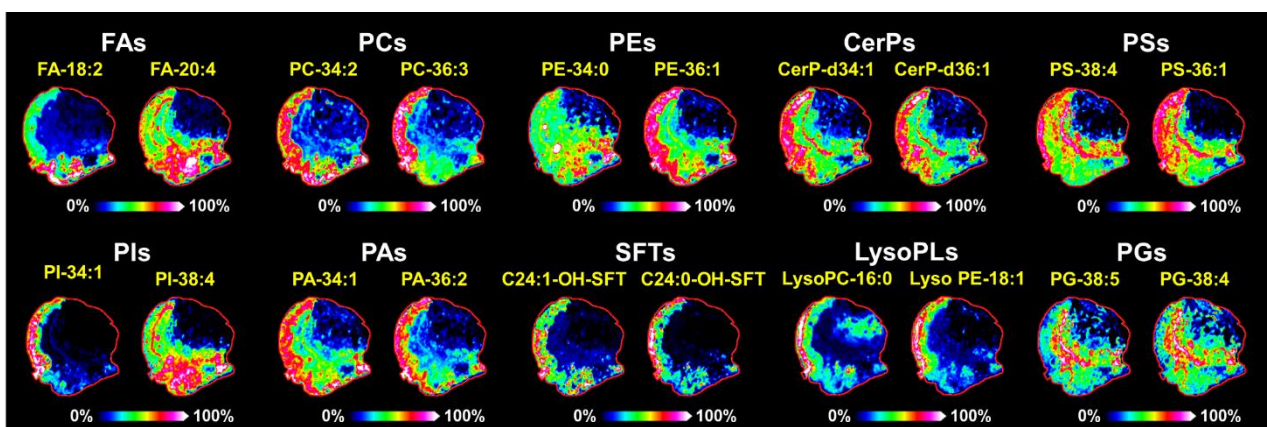

**Supplementary Figure 8 | Representative lipids that imaged by MALDI-MSI based platform. PC:** Phosphatidylcholine, LysoPL: Lysophosphatide, PC: phosphatidylcholine, PE: phosphatidylethanolamine, CerP: ceramide-phosphate, PS: phosphatidylserine, PG: phosphatidylglycerol, PI: phosphatidylinositol, PA: phosphatidic acid, SFT: sulfatide, intensity in colour scale is relative value.

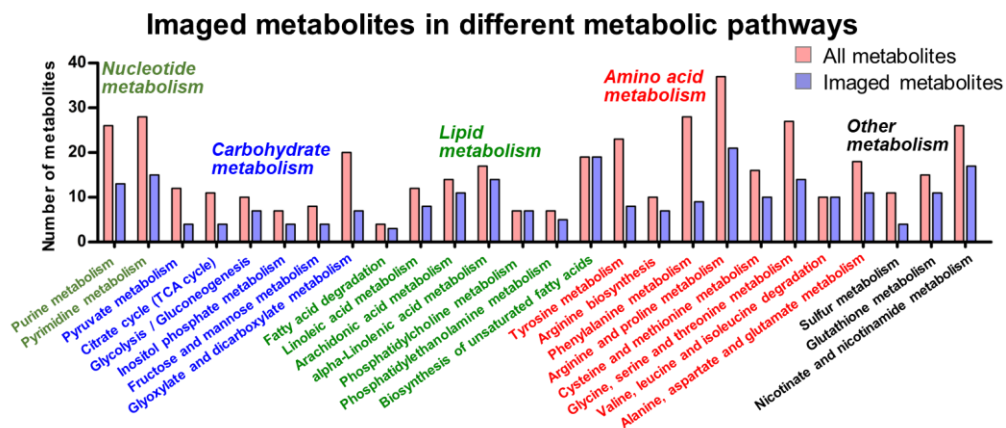

Supplementary Figure 9 | Imaged metabolites and lipids in different metabolic pathways.

### Purine metabolism

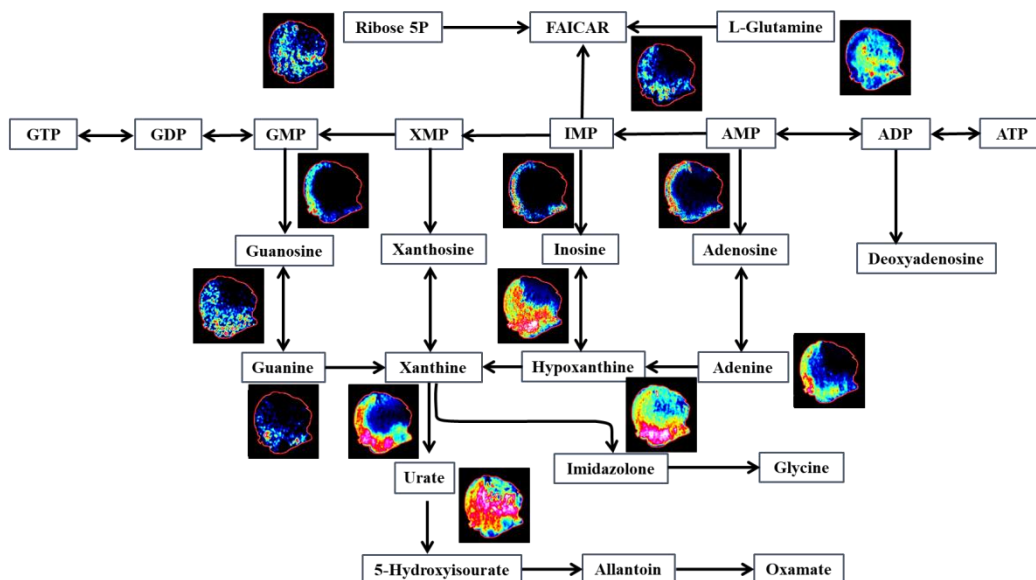

Supplementary Figure 10 | MS images of detected metabolites in purine metabolism pathway (intensity in colour scale is relative value).

## Pyrimidine metabolism

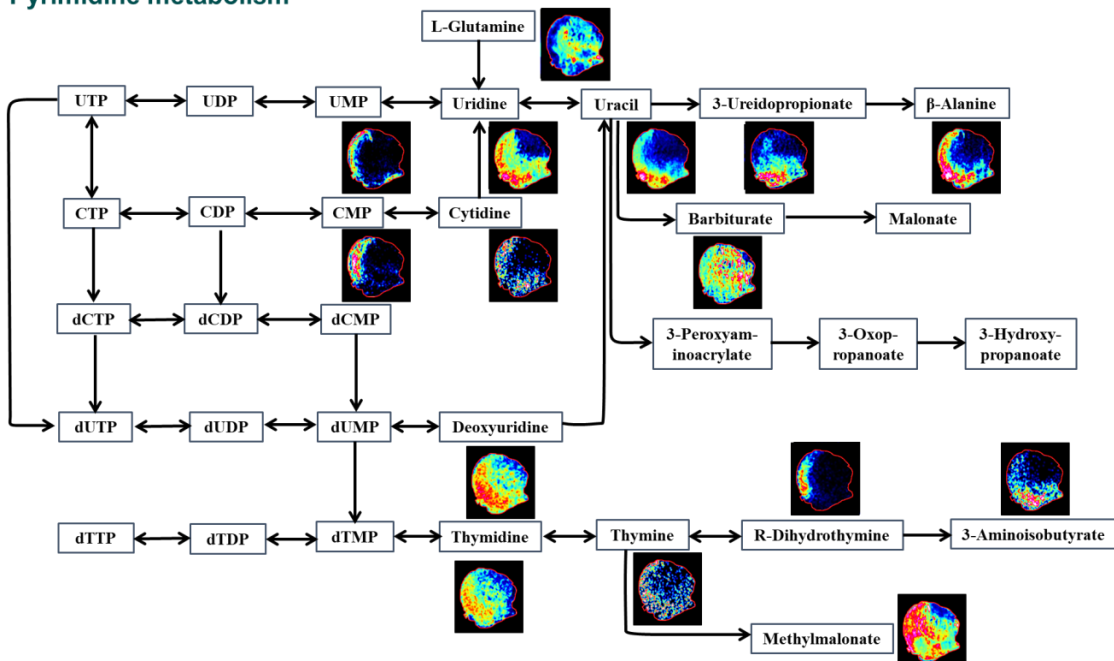

Supplementary Figure 11 | MS images of detected metabolites in pyrimidine metabolism pathway (intensity in colour scale is relative value).

## Pyruvate metabolism

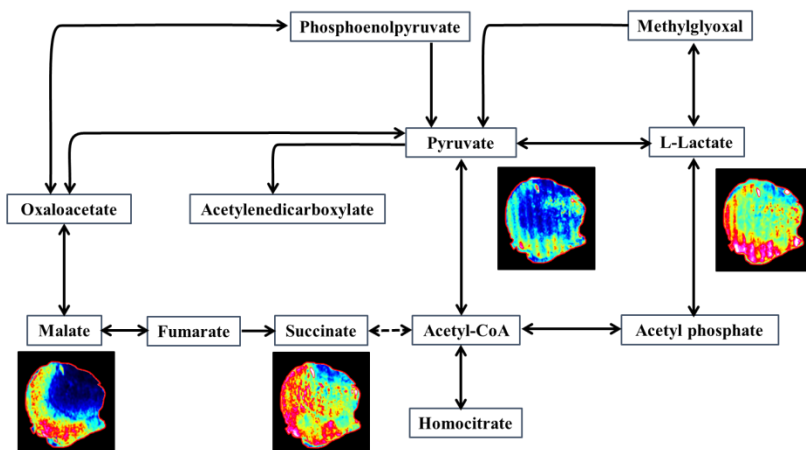

Supplementary Figure 12 | MS images of detected metabolites in pyruvate metabolism pathway (intensity in colour scale is relative value).

### Citrate cycle (TCA cycle)

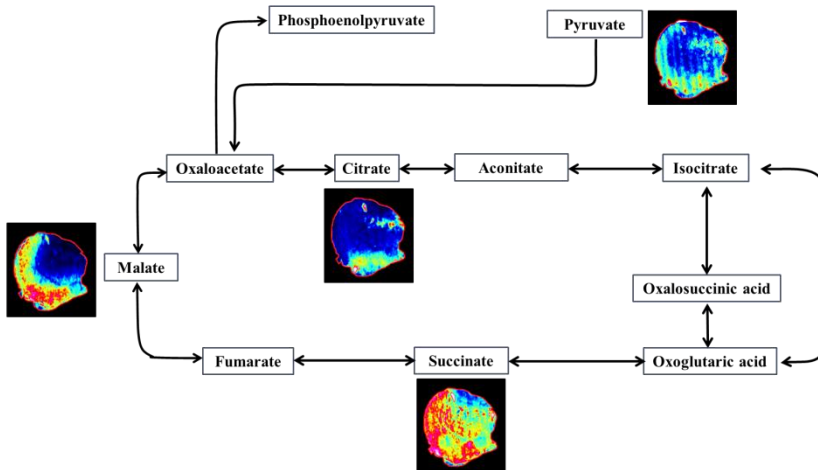

Supplementary Figure 13 | MS images of detected metabolites in citrate cycle pathway (intensity in colour scale is relative value).

### Glycolysis / Gluconeogenesis

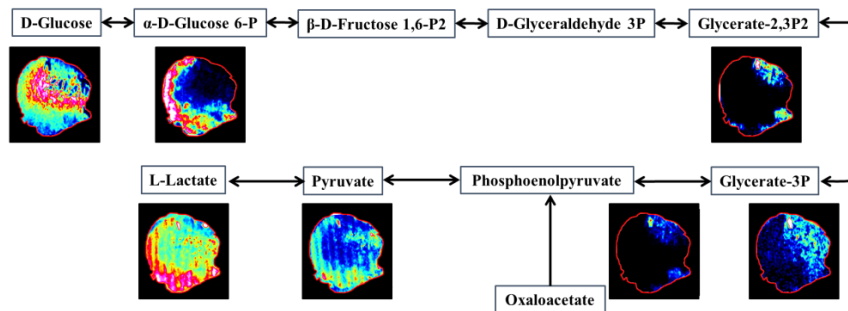

Supplementary Figure 14 | MS images of detected metabolites in glycolysis and gluconeogenesis pathways (intensity in colour scale is relative value).

### Inositol phosphate metabolism

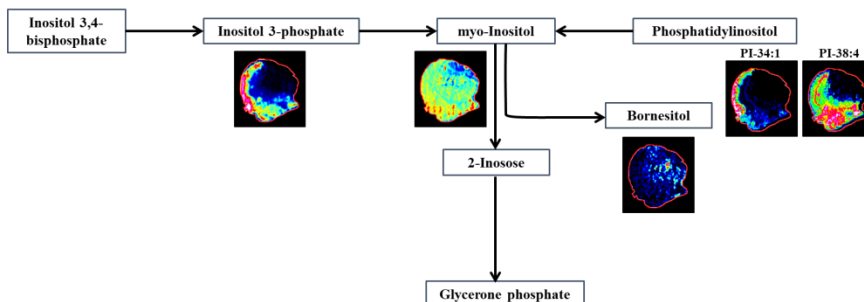

Supplementary Figure 15 | MS images of detected metabolites in inositol phosphate pathway (intensity in colour

scale is relative value).

### Fructose and mannose metabolism

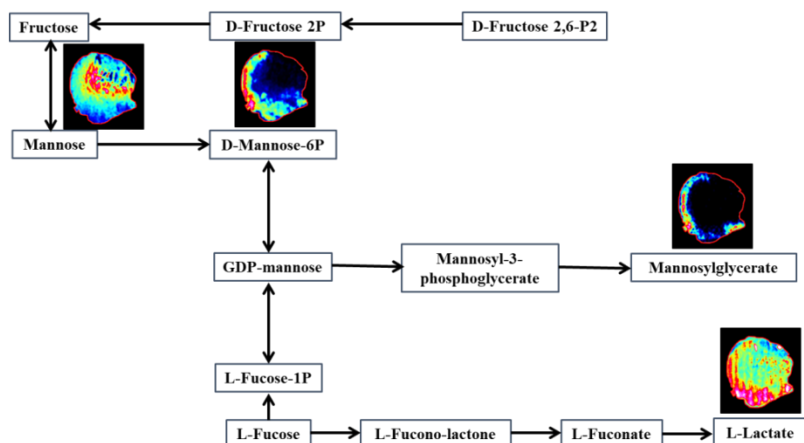

Supplementary Figure 16 | MS images of detected metabolites in fructose and mannose metabolism pathway (intensity in colour scale is relative value).

### Glyoxylate and dicarboxylate metabolism

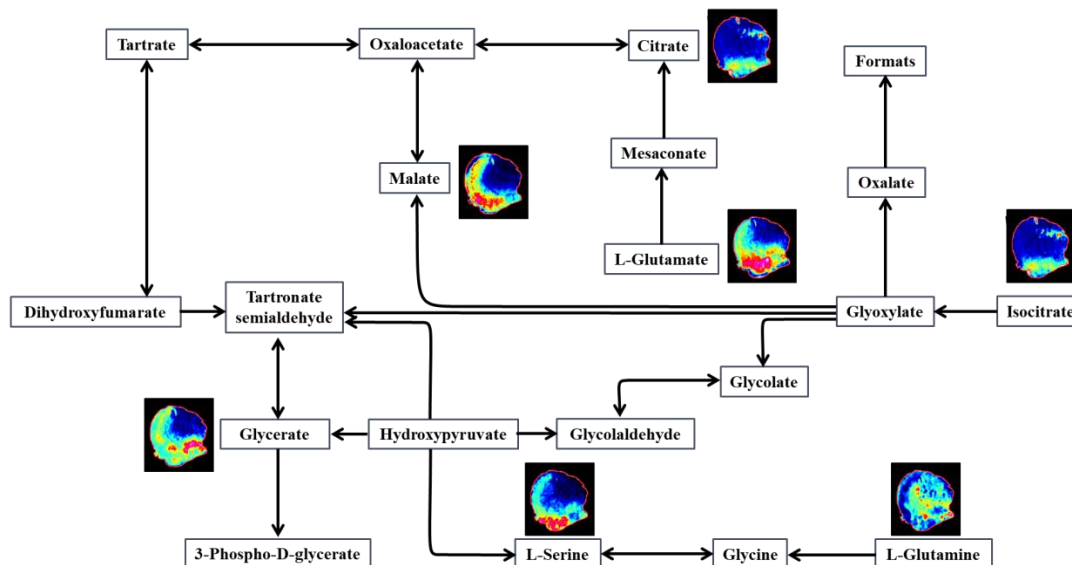

Supplementary Figure 17 | MS images of detected metabolites in glyoxylate and dicarboxylate pathway (intensity in colour scale is relative value).

### Fatty acid degradation

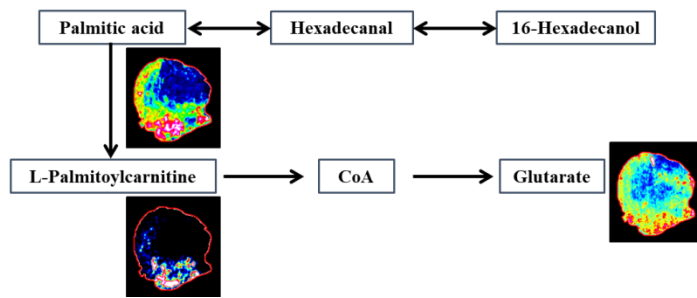

Supplementary Figure 18 | MS images of detected metabolites in fatty acid degradation pathway (intensity in colour scale is relative value).

### Linoleic acid metabolism

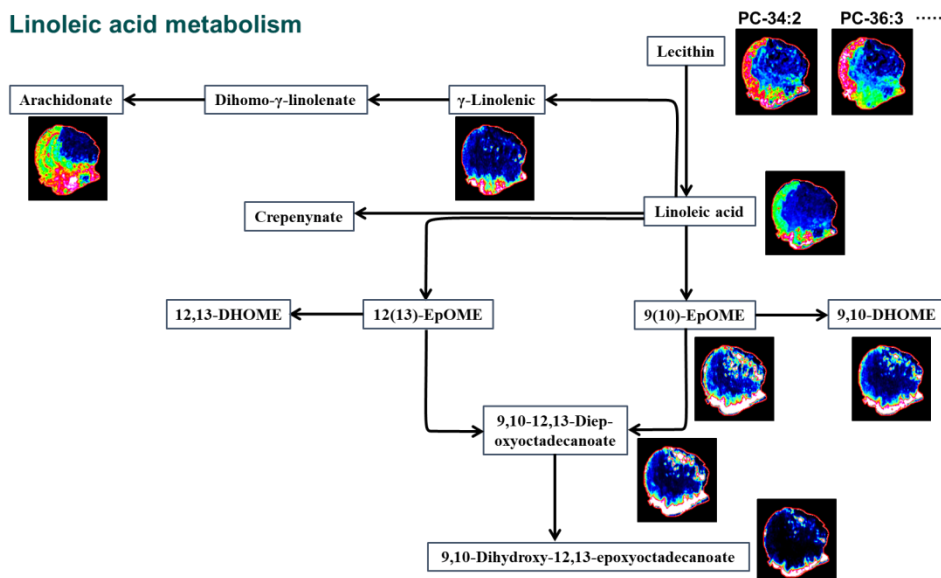

Supplementary Figure 19 | MS images of detected metabolites in linoleic acid metabolism pathway (intensity in colour scale is relative value).

### Arachidonic acid metabolism

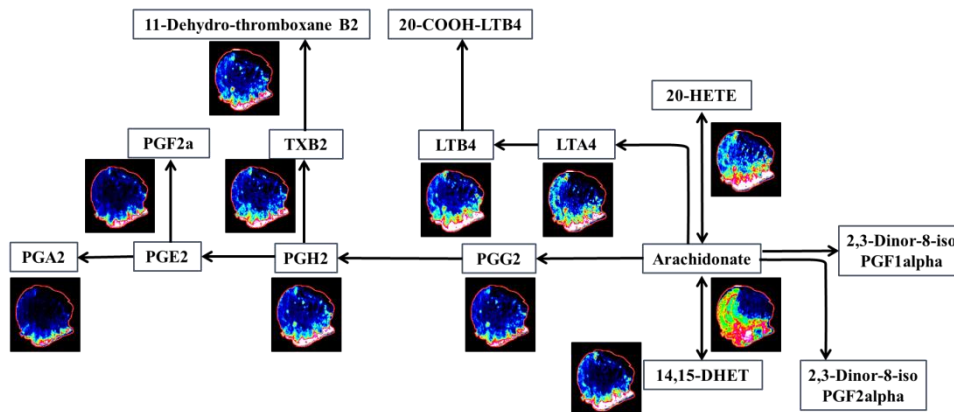

Supplementary Figure 20 | MS images of detected metabolites in arachidonic acid metabolism pathway (intensity in colour scale is relative value).

### alpha-Linolenic acid metabolism

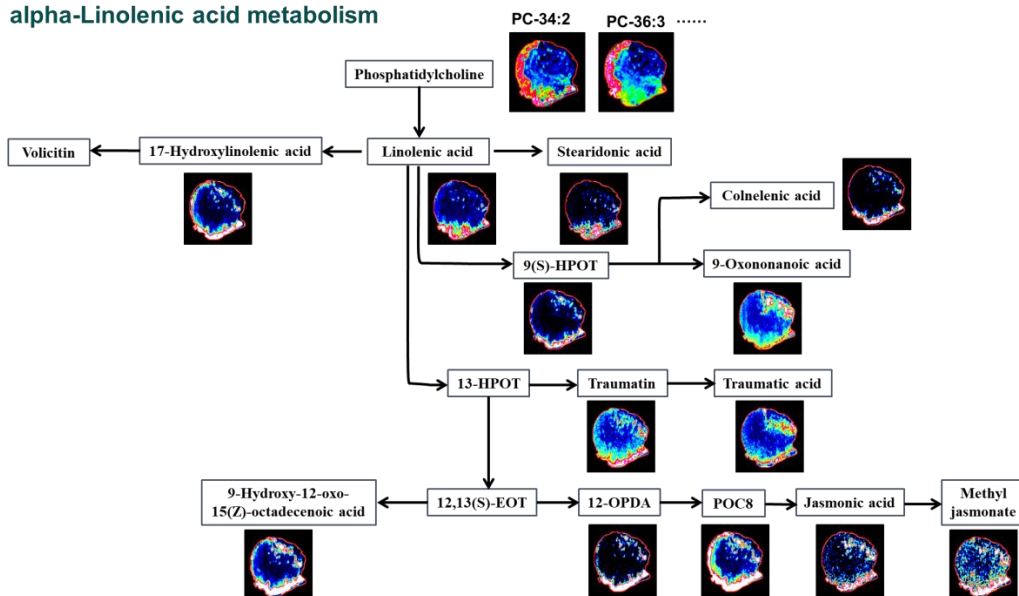

Supplementary Figure 21 | MS images of detected metabolites in alpha-linolenic acid metabolism pathway (intensity in colour scale is relative value).

### Phosphatidylcholine metabolism

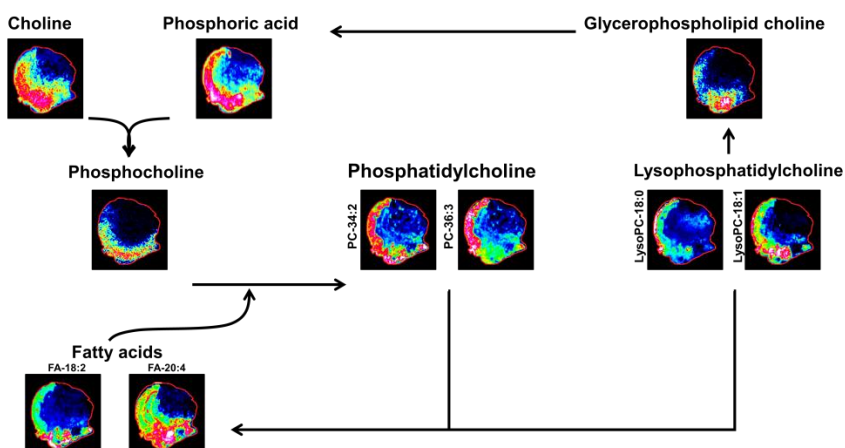

Supplementary Figure 22 | MS images of detected metabolites in phosphatidylcholine metabolism pathway (intensity in colour scale is relative value).

### Phosphatidylethanolamine metabolism

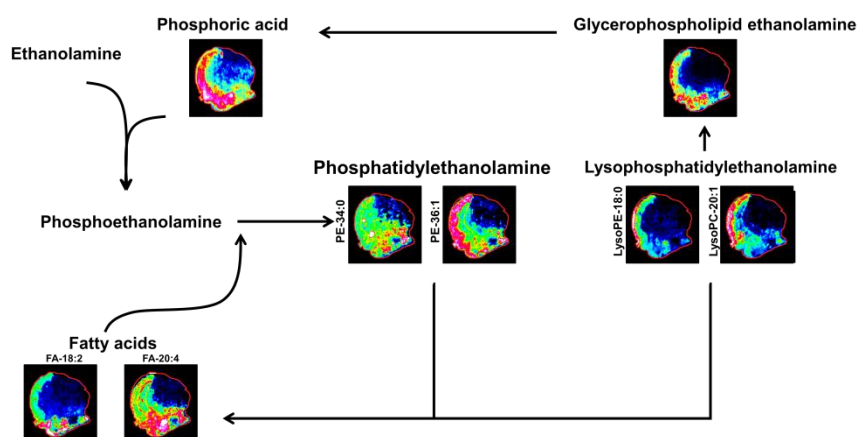

Supplementary Figure 23 | MS images of detected metabolites in phosphatidylethanolamine metabolism pathway (intensity in colour scale is relative value).

### Biosynthesis of unsaturated fatty acids

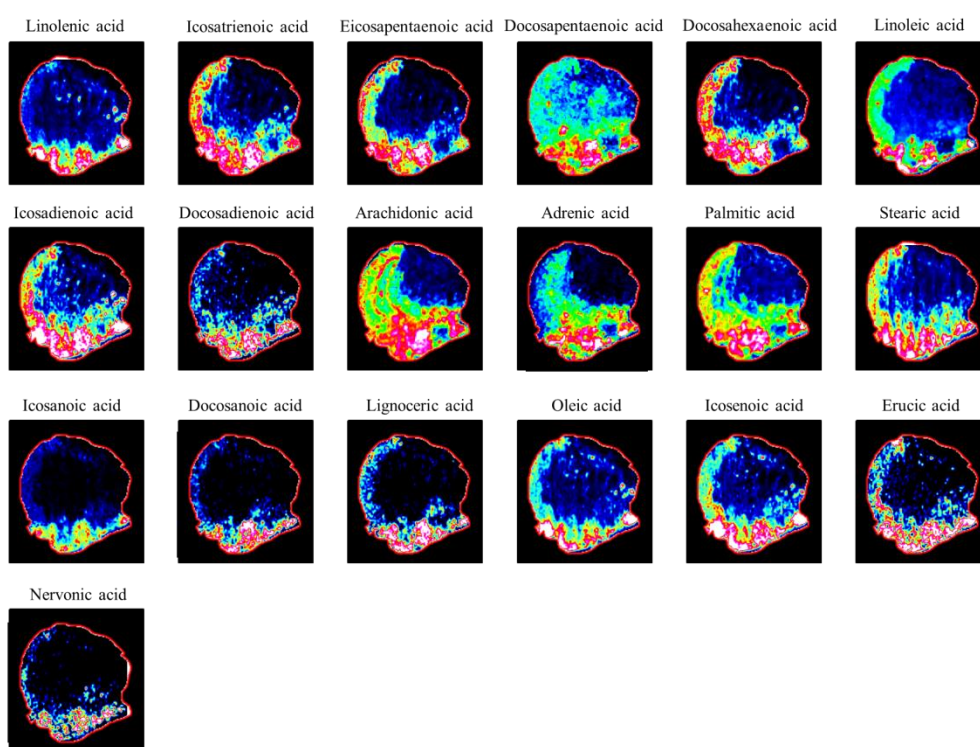

Supplementary Figure 24 | MS images of detected metabolites in biosynthesis of unsaturated fatty acids pathway (intensity in colour scale is relative value).

## Tyrosine metabolism

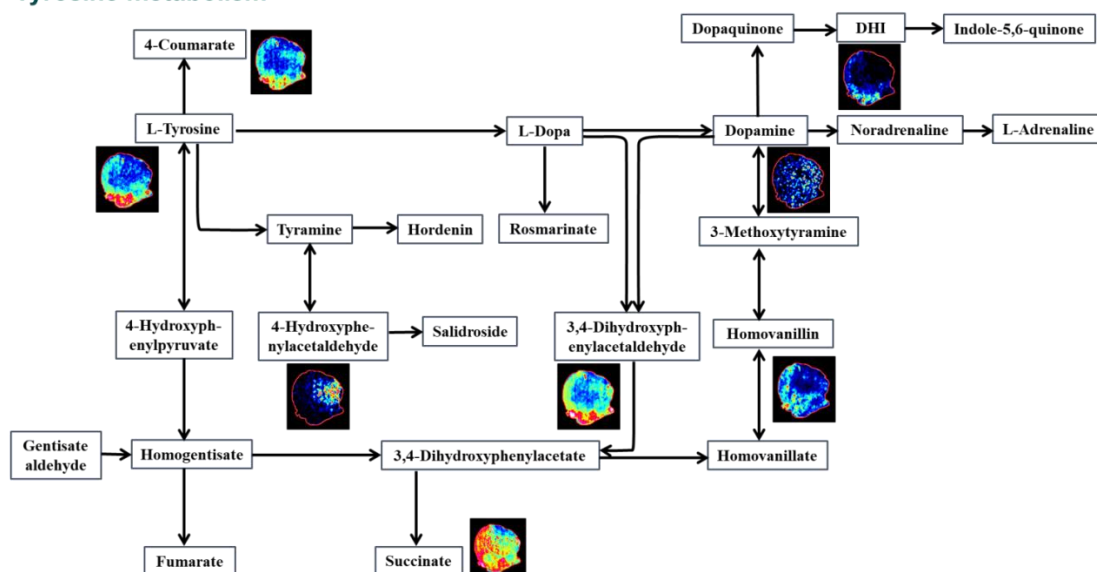

Supplementary Figure 25 | MS images of detected metabolites in tyrosine metabolism pathway (intensity in colour scale is relative value).

## Arginine biosynthesis

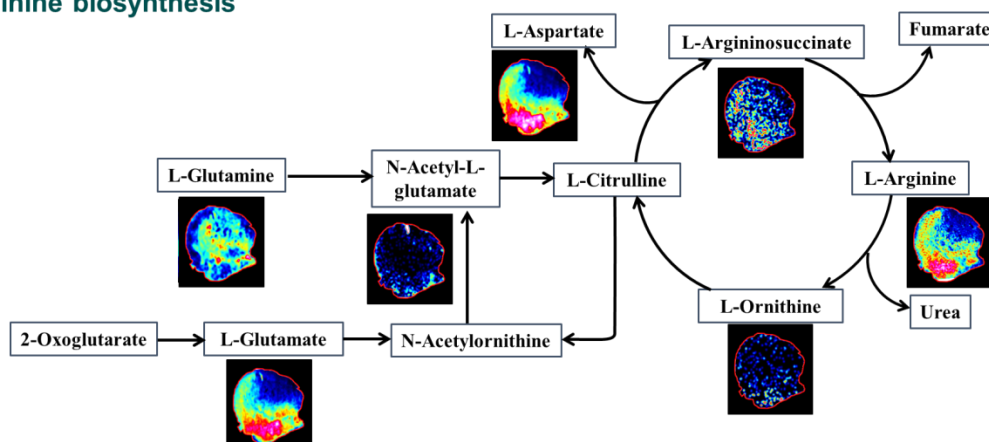

Supplementary Figure 26 | MS images of detected metabolites in arginine biosynthesis pathway (intensity in colour scale is relative value).

## Phenylalanine metabolism

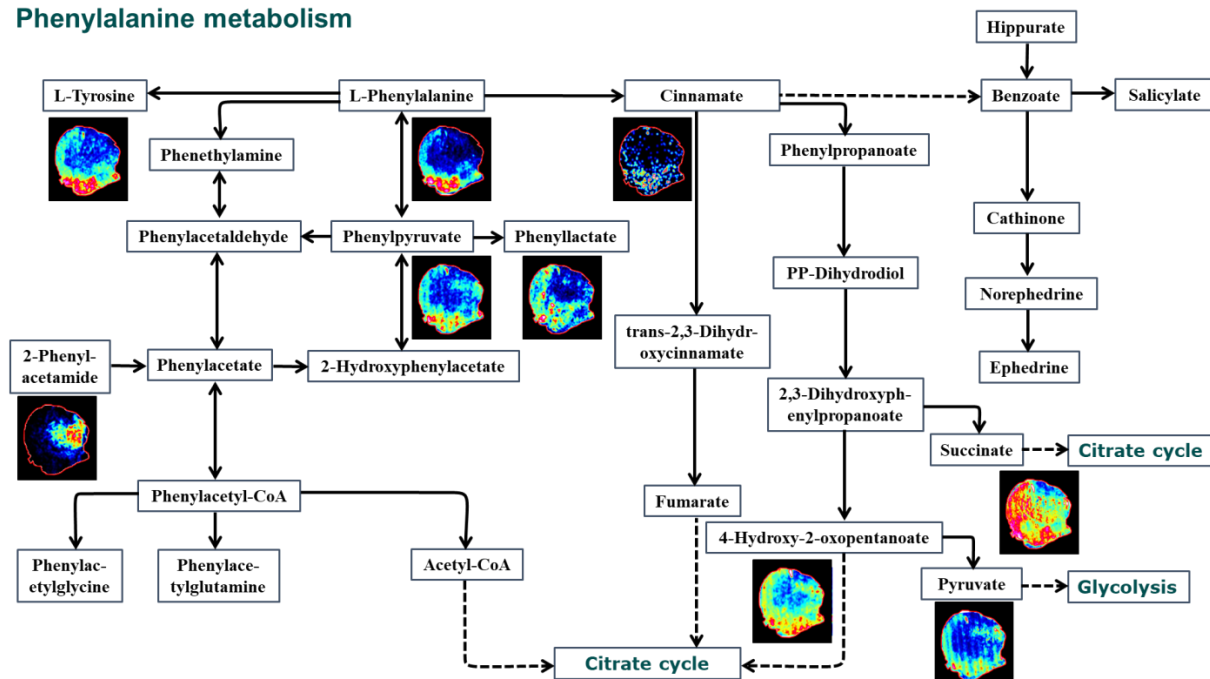

Supplementary Figure 27 | MS images of detected metabolites in phenylalanine metabolism pathway (intensity in colour scale is relative value).

## Arginine and proline metabolism

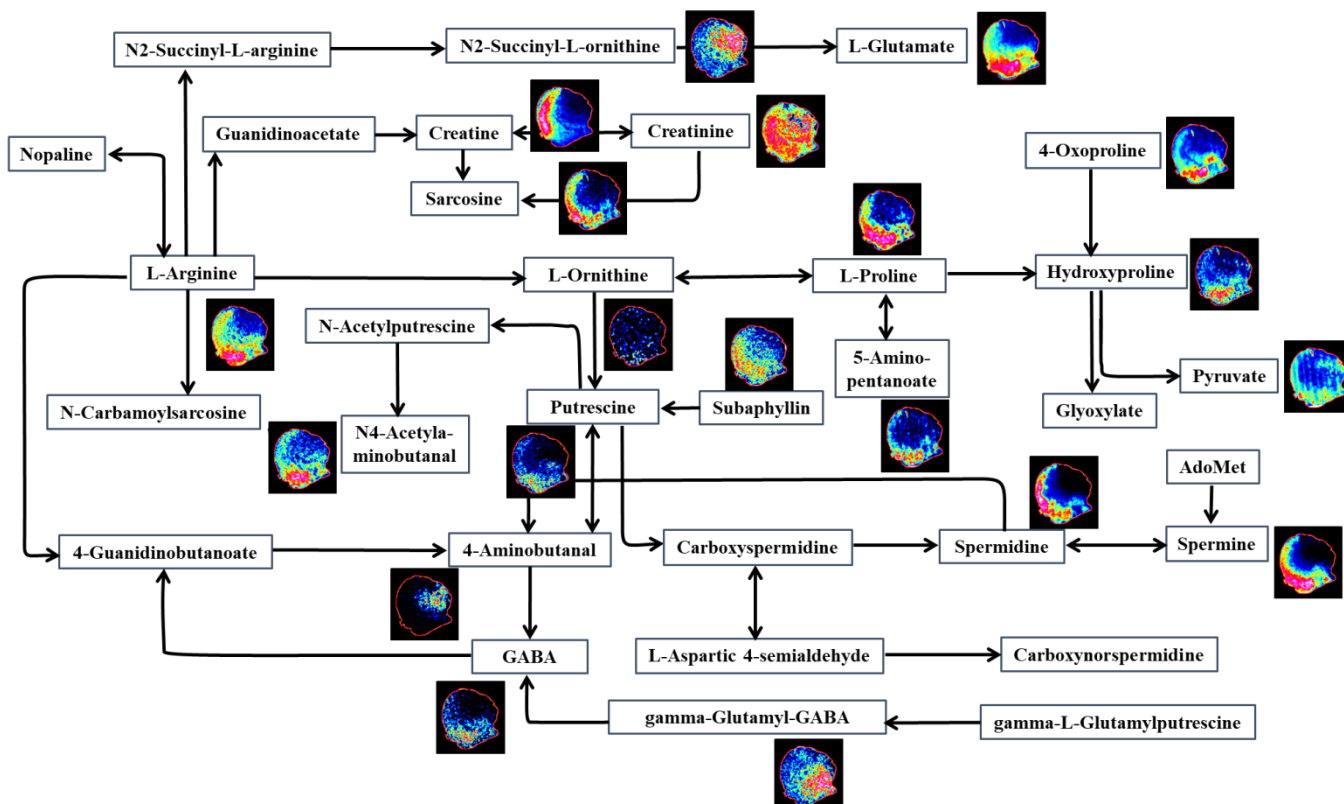

Supplementary Figure 28 | MS images of detected metabolites in arginine and proline metabolism pathway (intensity in colour scale is relative value).

The diagram illustrates the metabolic pathway of the methionine cycle and transsulfuration pathway. The central metabolite is L-Cysteine, which is converted to L-Cystate and then to Pyruvate. L-Cysteine is also converted to L-Cystathionine, which is then converted to 2-Oxobutanoate. L-Cystathionine is also converted to L-Homocysteine, which is then converted to Methionine. Methionine is converted to AdoMet. L-Homocysteine is also converted to N-Formylmethionine. L-Methionine S-oxide is converted to Methionine. The diagram includes brain maps for each metabolite, showing their distribution in the brain.

```
graph TD
    L-Methionine_S-oxide[L-Methionine S-oxide] --> Methionine[Methionine]
    N-Formylmethionine[N-Formylmethionine] --> L-Homocysteine[L-Homocysteine]
    L-Homocysteine --> L-Cystathionine[L-Cystathionine]
    L-Cystathionine --> L-Cysteine[L-Cysteine]
    L-Cysteine --> L-Cystate[L-Cystate]
    L-Cysteine --> L-Serine[L-Serine]
    L-Cysteine --> O-Phospho-L-serine[O-Phospho-L-serine]
    L-Cysteine --> S-Sulfo-L-cysteine[S-Sulfo-L-cysteine]
    L-Cysteine -.-> 2-Aminobutanoate[2-Aminobutanoate]
    2-Aminobutanoate --> L-Cystate
    L-Cystate --> Pyruvate[Pyruvate]
    L-Cystate --> L-Cystathionine
    L-Cystathionine --> 2-Oxobutanoate[2-Oxobutanoate]
    2-Oxobutanoate --> AdoMet[AdoMet]
    Methionine --> AdoMet
```

**Supplementary Figure 29 | MS images of detected metabolites in cysteine and methionine metabolism pathway (intensity in colour scale is relative value).**

Metabolic map showing the interconnections of various metabolites in the brain. The map includes metabolites such as Hydroxypyruvate, Glycerate, 3P-D-glycerate, Phosphoserine, L-Tryptophan, L-Serine, Pyruvate, L-Cystathionine, L-Cysteine, 5-Aminolevulinate, L-Allothreonine, L-2-Aminoacetoacetate, Aminoacetone, Methylglyoxal, Glycine, L-Threonine, O-Phospho-L-homoserine, L-Homoserine, L-Aspartate, 2-Oxobutanoate, Guanidinoacetate, Creatine, Dimethylglycine, Sarcosine, Betaine, and Choline. Each metabolite is represented by a box, and their interconnections are shown by arrows. Brain maps are included for many metabolites, indicating their distribution in the brain.

**Supplementary Figure 30 | MS images of detected metabolites in glycine, serine and threonine metabolism pathway (intensity in colour scale is relative value).**

### Valine, leucine and isoleucine degradation

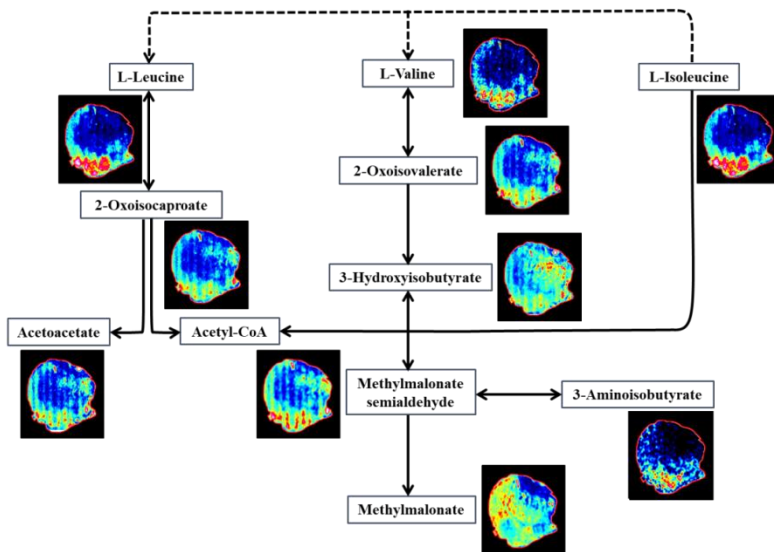

Supplementary Figure 31 | MS images of detected metabolites in valine, leucine and isoleucine degradation pathway (intensity in colour scale is relative value).

### Alanine, aspartate and glutamate metabolism

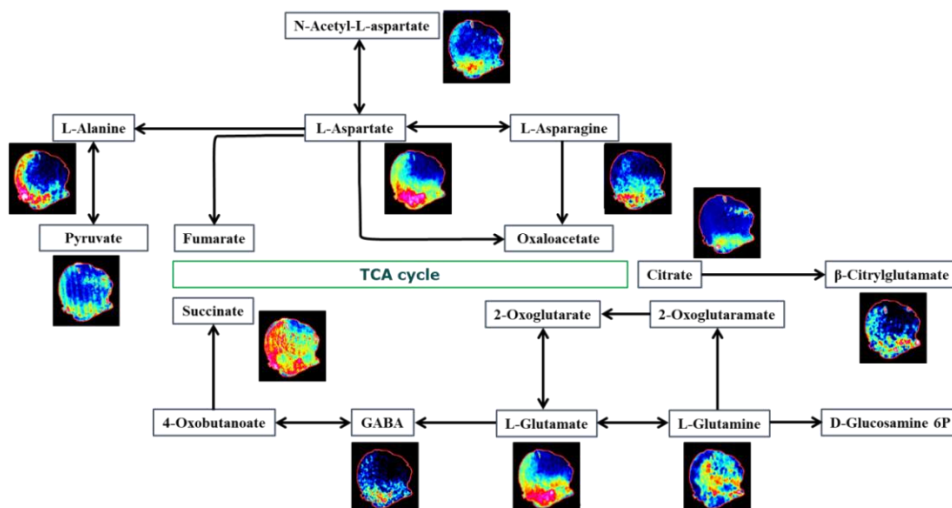

Supplementary Figure 32 | MS images of detected metabolites in alanine, aspartate and glutamate metabolism pathway (intensity in colour scale is relative value).

### Sulfur metabolism

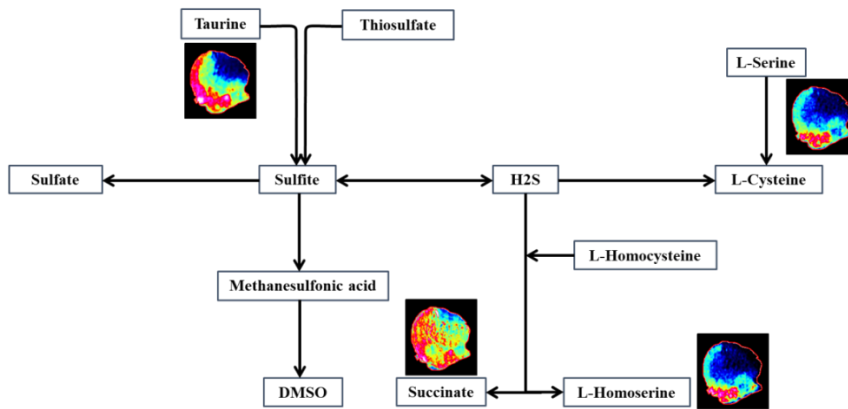

Supplementary Figure 33 | MS images of detected metabolites in sulfur metabolism pathway (intensity in colour scale is relative value).

### Glutathione metabolism

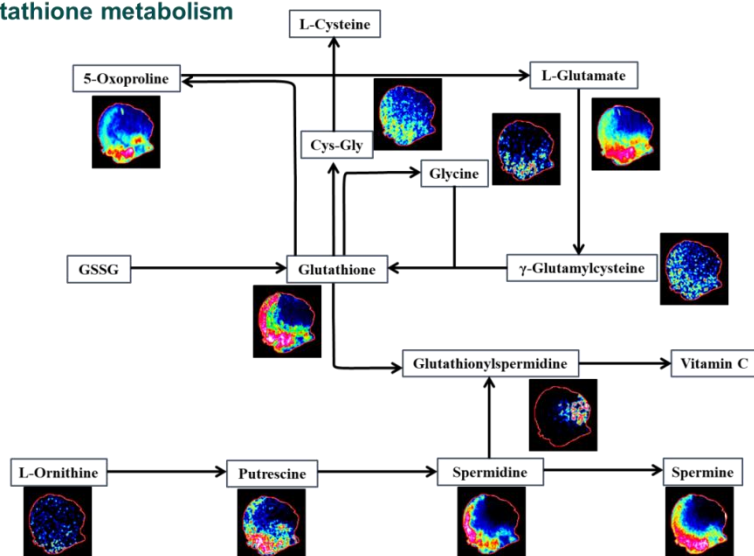

Supplementary Figure 34 | MS images of detected metabolites in glutathione metabolism pathway (intensity in colour scale is relative value).

## Nicotinate and nicotinamide metabolism

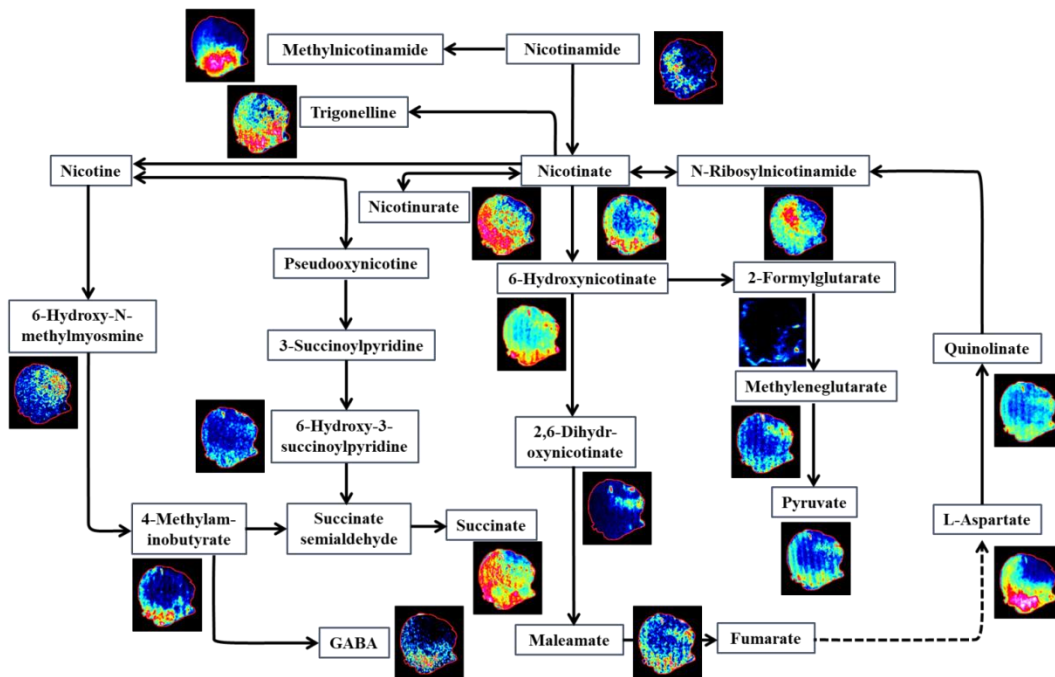

Supplementary Figure 35 | MS images of detected metabolites in nicotinate and nicotinamide metabolism pathway (intensity in colour scale is relative value).

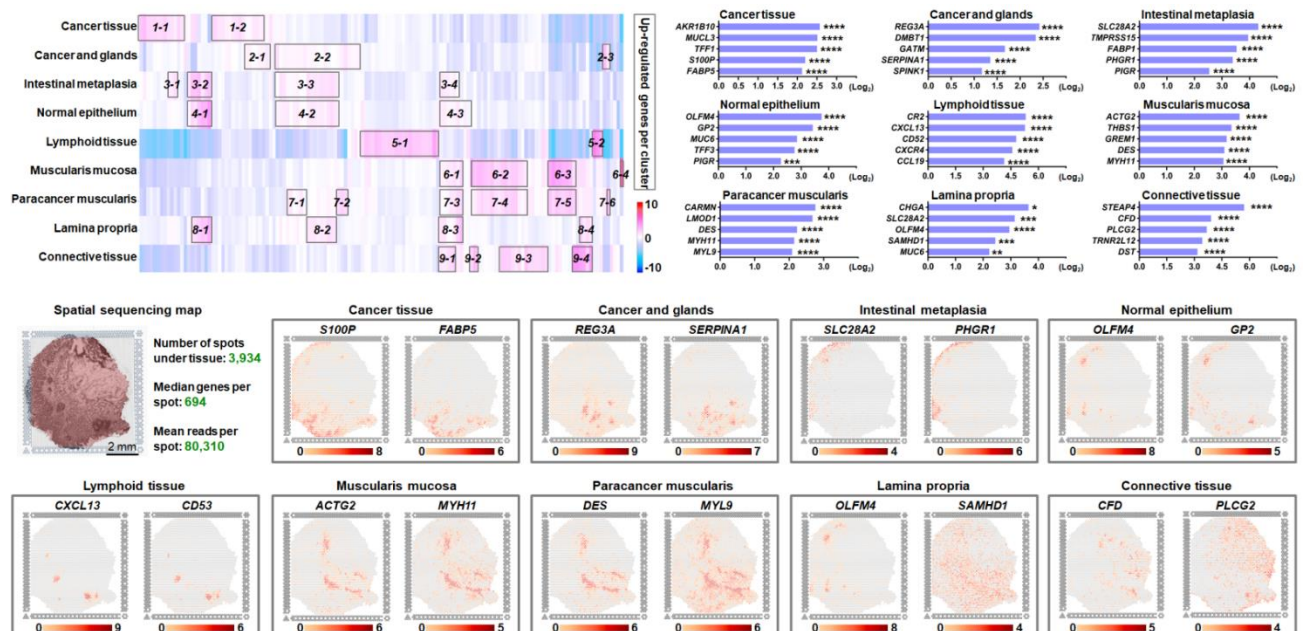

Supplementary Figure 36 | Visualization of region-specific genes in gastric cancer tissue. All scanning spots ( $n = 3934$ , the  $n$  number means the total number of spatial transcriptomics sequencing spots from patient "No.0429") were used for statistical analysis, \*\*\*\* $p < 0.001$ , \*\*\* $p < 0.01$ , \*\* $p < 0.05$ , \* $p < 0.1$ ,  $p$ -values are adjusted using the Benjamini-Hochberg correction for multiple tests, intensity in colour scale is log2 transformed.

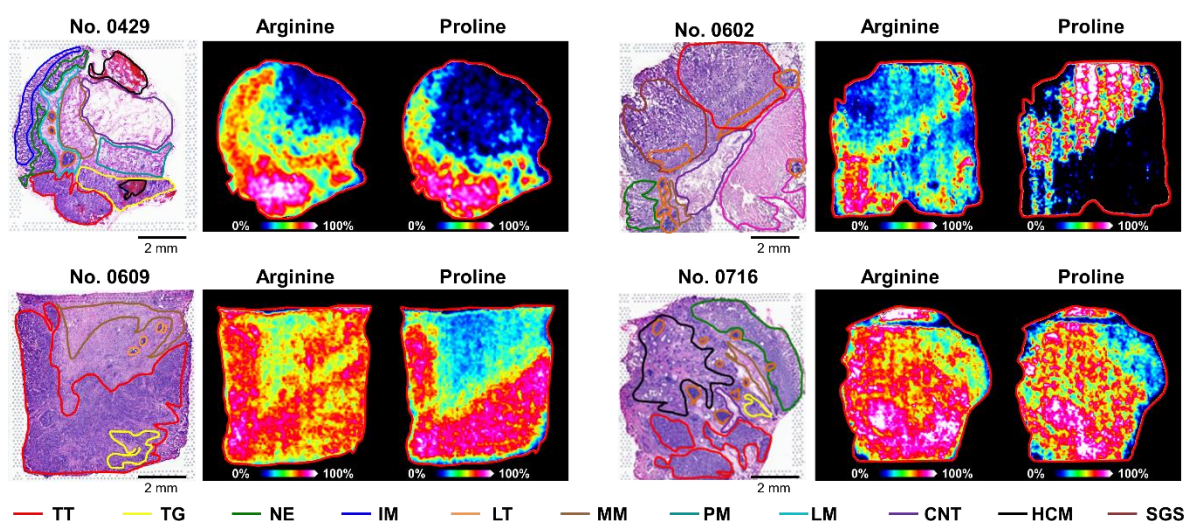

**Supplementary Figure 37 | MS images of arginine and proline in gastric cancer tissue sections.** TT: tumor tissue, TG: tumor and gland tissue, NE: normal epithelium, IM: intestinal metaplasia, LT: lymphoid tissue, MM: muscularis mucosa, PM: peritumoral muscularis, LM: lamina propria, CNT: connective tissue, SGS: serrated glandular structure, HCM: heterotopic cystic malformation, intensity in colour scale is relative value. Scale bar = 2 mm

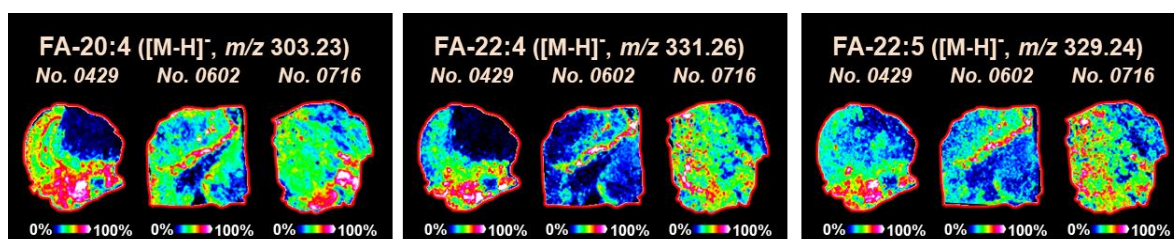

**Supplementary Figure 38 | MS images of representative polyunsaturated long-chain fatty acids in gastric cancer tissue sections,** intensity in colour scale is relative value.

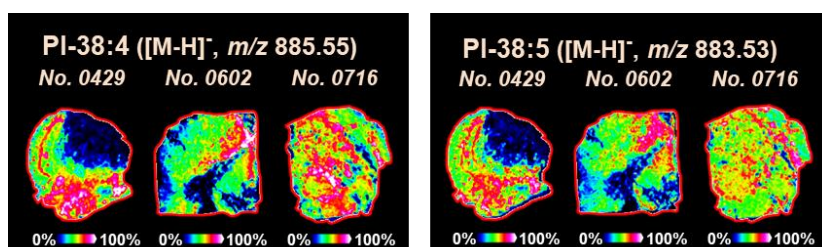

**Supplementary Figure 39 | MS images of representative polyunsaturated PIs in gastric cancer tissue sections,** intensity in colour scale is relative value.

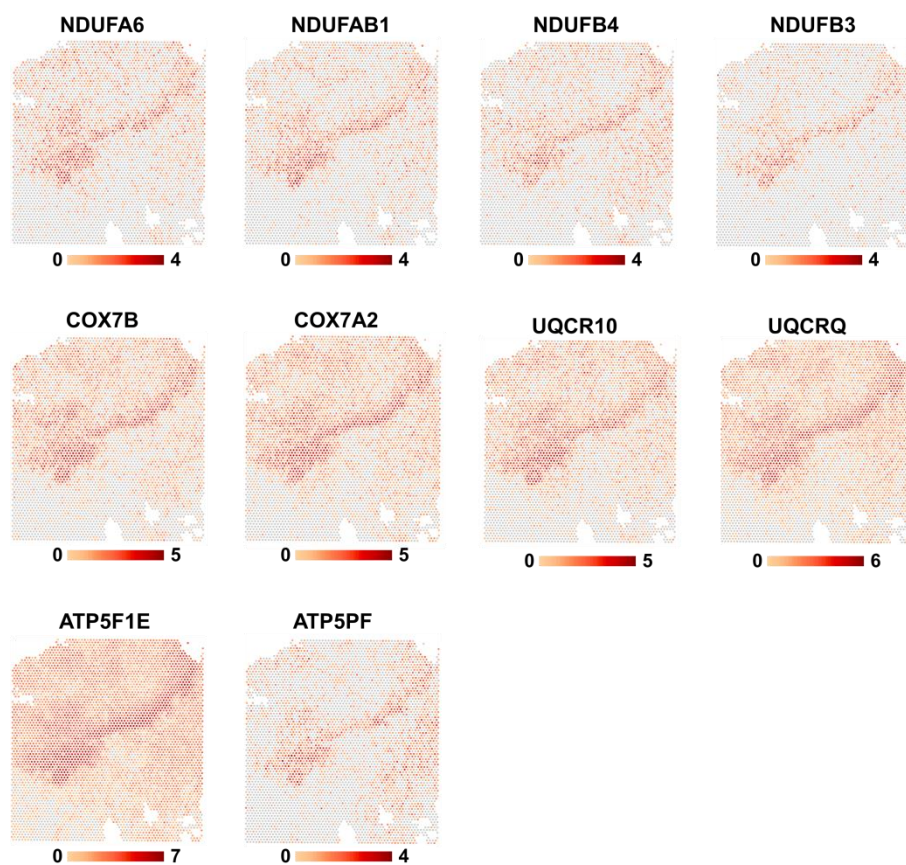

**Supplementary Figure 40 | Other altered genes in oxidative phosphorylation pathway, intensity in colour scale is log2 transformed.**

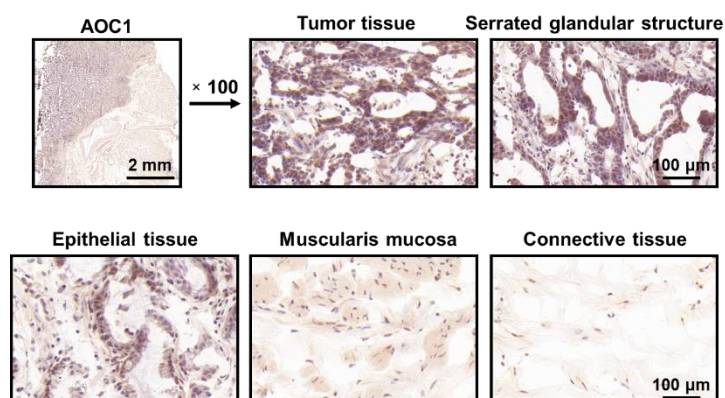

**Supplementary Figure 41 | Expression of AOC1 in different tissue regions of the gastric cancer tissue section.** Scale bar = 2 mm for whole tissue sections, scale bar = 100  $\mu$ m for magnified image. The IHC images are representative of one patient “No.0602”, and the experiment was repeated three times.

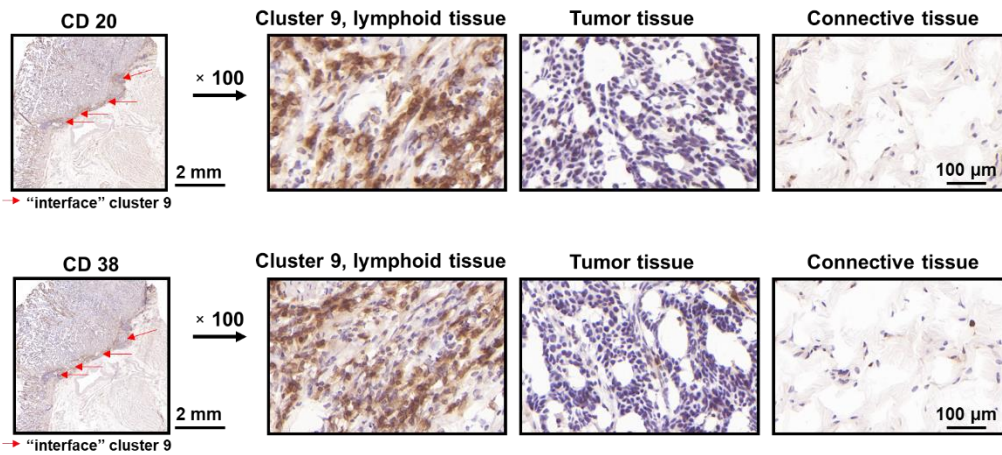

**Supplementary Figure 42 | IHC stain image of CD20 and CD 38 in adjacent gastric cancer tissue sections from patient "No.0602".** Scale bar = 2 mm for whole tissue sections, scale bar = 100 μm for magnified image. The IHC images are representative of one patient "No.0602", and the experiment was repeated three times.

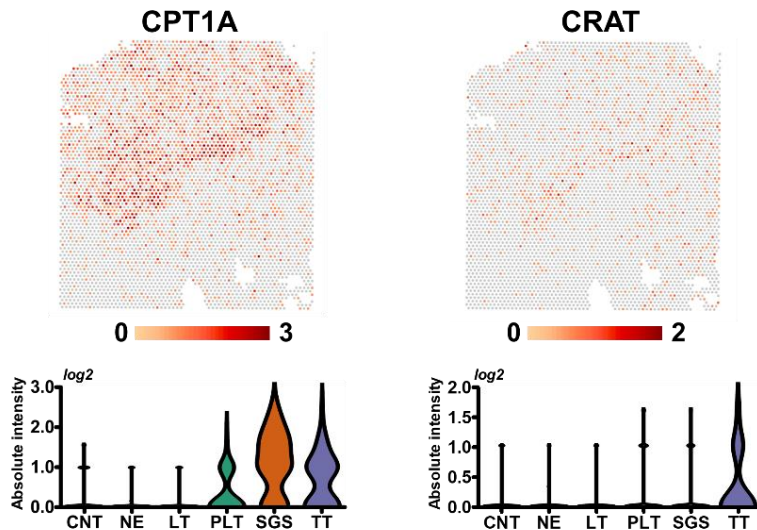

**Supplementary Figure 43 | Expressions of CPT1A and CRAT genes, intensity in colour scale is log2 transformed.**

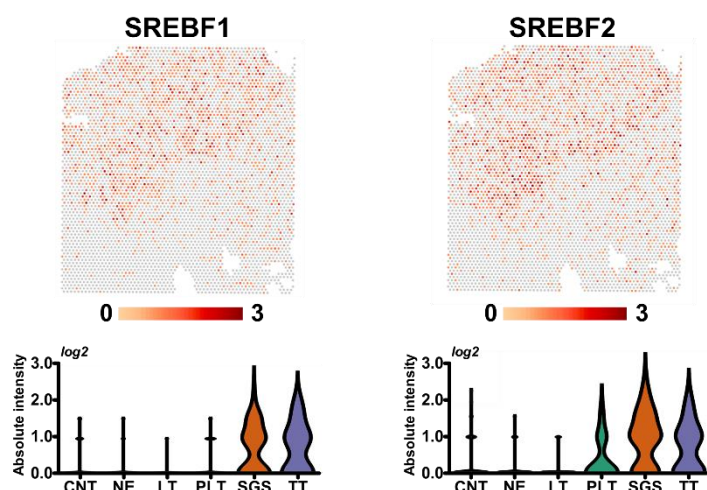

**Supplementary Figure 44 | Expressions of SREBF1 and SREBF2 genes, intensity in colour scale is log2 transformed.**

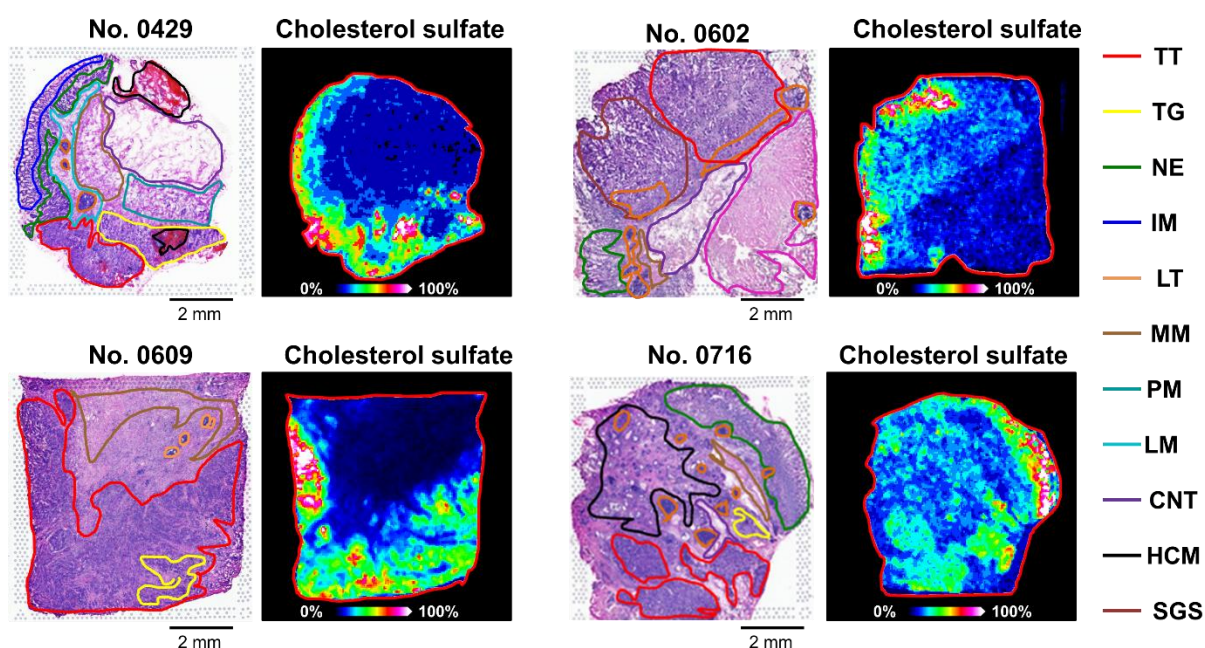

**Supplementary Figure 45 | MS images of cholesterol sulfate in different gastric cancer tissue sections.** TT: tumor tissue, TG: tumor and gland tissue, NE: normal epithelium, IM: intestinal metaplasia, LT: lymphoid tissue, MM: muscularis mucosa, PM: peritumoral muscularis, LM: lamina propria, CNT: connective tissue, SGS: serrated glandular structure, HCM: heterotopic cystic malformation, intensity in colour scale is relative value. Scale bar = 2 mm.

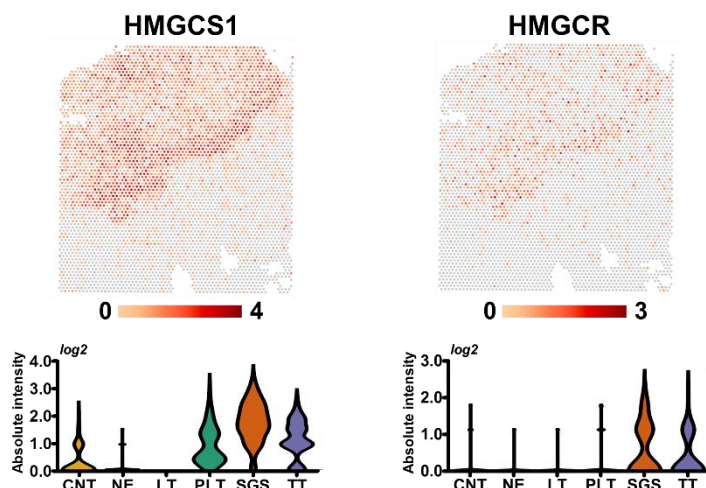

**Supplementary Figure 46 | Expressions of HMGC1 and HMGC2 genes, intensity in colour scale is log2 transformed.**

#### Choline

TUMOR-PRM-POS1 #289-358 RT: 1.00-1.14 AV: 2 SB: 7 0.26-0.68, 2.66-3.26 NL: 3.90E7  
F: FTMS + p ESI Full ms2 104.1070@hcd15.00 [50.0000-125.0000]

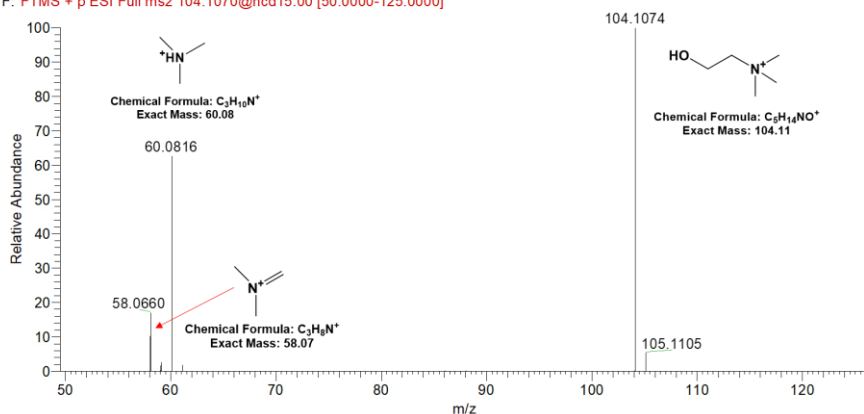

**Supplementary Figure 47 | The MS/MS spectrum and the fragmentation pathway of choline.**

#### Lactic acid

TUMOR-PRM-NEG89 #450-496 RT: 1.54-1.68 AV: 23 SB: 601 0.00-0.90, 10.03-13.32 NL: 2.50E5  
F: FTMS - p ESI Full ms2 89.0243@hcd30.00 [50.0000-110.0000]

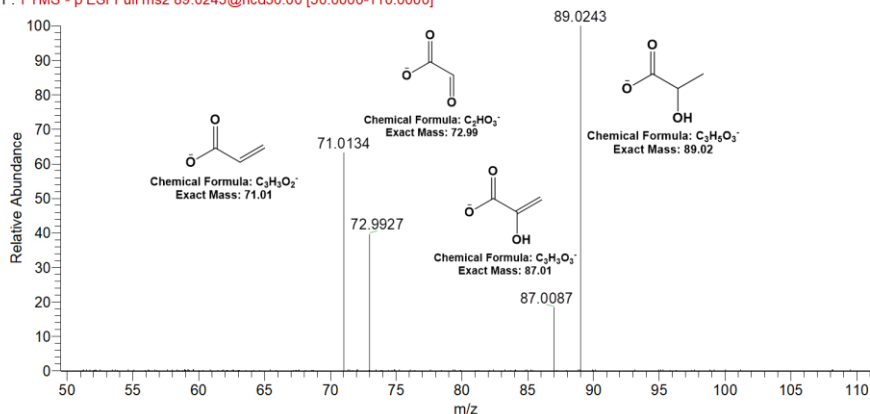

**Supplementary Figure 48 | The MS/MS spectrum and the fragmentation pathway of lactic acid.**

### Histamine

TUMOR-PRM-POS1 #232 RT: 0.87 AV: 1 SB: 9 0.11-0.52, 4.92-5.74 NL: 1.94E6  
F: FTMS + p ESI Full ms2 112.0869@hcd15.00 [50.0000-135.0000]

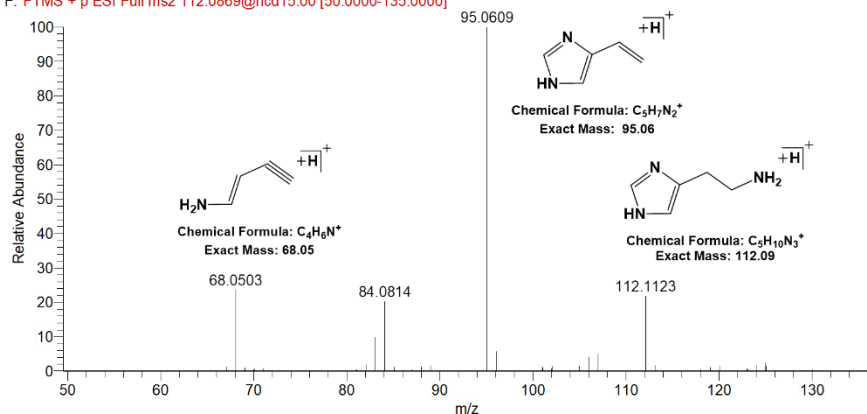

Supplementary Figure 49 | The MS/MS spectrum and the fragmentation pathway of histamine.

### Proline

TUMOR-PRM-POS1 #323 RT: 1.16 AV: 1 SB: 8 0.30-0.79, 1.80-2.36 NL: 3.34E8  
F: FTMS + p ESI Full ms2 116.0706@hcd15.00 [50.0000-140.0000]

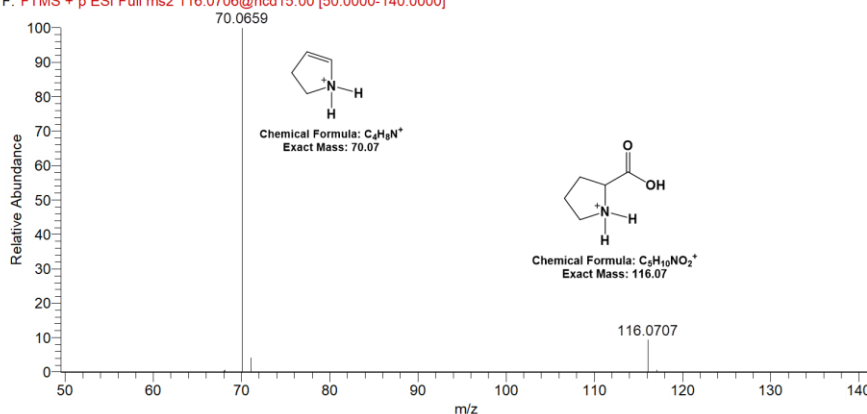

Supplementary Figure 50 | The MS/MS spectrum and the fragmentation pathway of proline.

### Taurine

TUMOR-PRM-NEG1-15V #295 RT: 1.10 AV: 1 SB: 1 0.89-0.95, 1.38-1.57 NL: 1.57E7  
F: FTMS - p ESI Full ms2 124.0074@hcd15.00 [50.0000-145.0000]

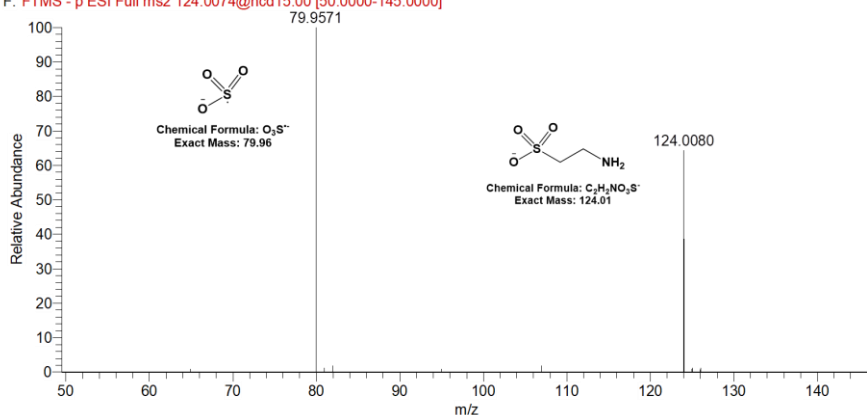

Supplementary Figure 51 | The MS/MS spectrum and the fragmentation pathway of taurine.

## Malic acid

TUMOR-PRM-NEG1-15V-3 #349-430 RT: 1.32-1.44 AV: 2 SB: 12 0.11-0.72 , 2.46-3.30 NL: 1.34E7  
F: FTMS - p ESI Full ms2 133.0142@hcd15.00 [50.0000-155.0000]

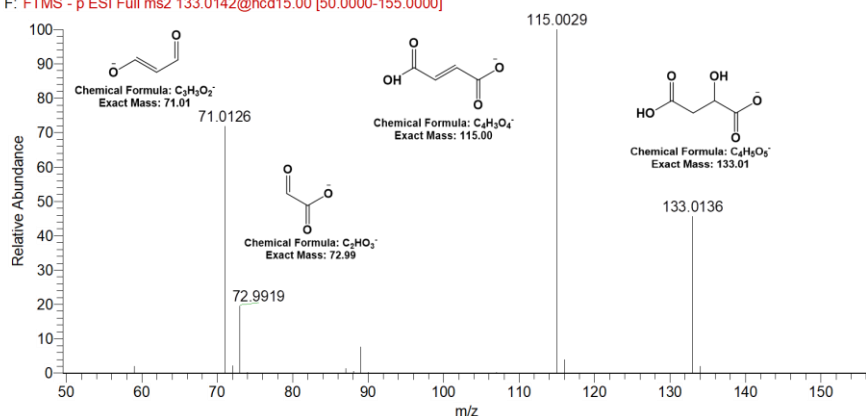

**Supplementary Figure 52 | The MS/MS spectrum and the fragmentation pathway of malic acid.**

## Hypoxanthine

TUMOR-PRM-NEG1-15V #608 RT: 2.12 AV: 1 SB: 4 1.74-1.89 , 2.48-2.78 NL: 1.20E7  
F: FTMS - p ESI Full ms2 135.0312@hcd15.00 [50.0000-155.0000]

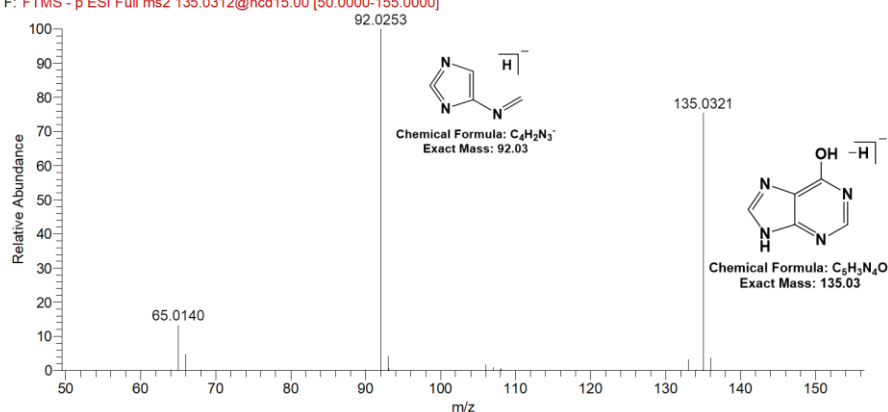

**Supplementary Figure 53 | The MS/MS spectrum and the fragmentation pathway of hypoxanthine.**

## Glutamate

TUMOR-PRM-NEG1-15V-2 221116233731 #278 RT: 1.05 AV: 1 SB: 2 0.71-0.82 , 1.49-1.64 NL: 1.79E7  
F: FTMS - p ESI Full ms2 146.0459@hcd15.00 [50.0000-170.0000]

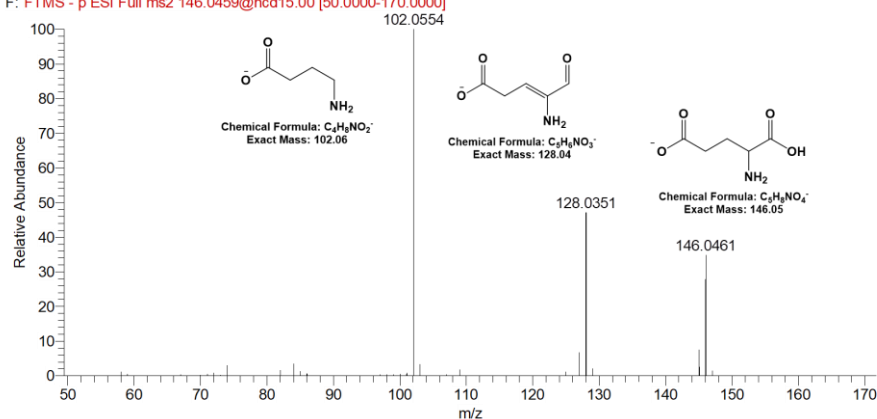

**Supplementary Figure 54 | The MS/MS spectrum and the fragmentation pathway of glutamate.**

### Spermidine

TUMOR-PRM-POS1 #217 RT: 0.77 AV: 1 SB: 5 0.16-0.49 , 3.14-3.47 NL: 3.05E6  
F: FTMS + p ESI Full ms2 146.1651@hcd15.00 [50.0000-170.0000]

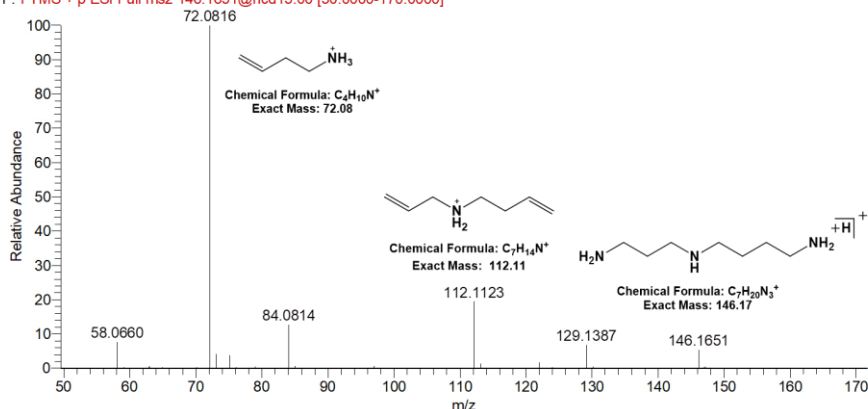

Supplementary Figure 55 | The MS/MS spectrum and the fragmentation pathway of spermidine.

### Spermine

TUMOR-PRM-POS1 #220 RT: 0.80 AV: 1 SB: 4 0.33-0.51 , 1.16-1.52 NL: 2.69E5  
F: FTMS + p ESI Full ms2 203.2228@hcd15.00 [50.0000-225.0000]

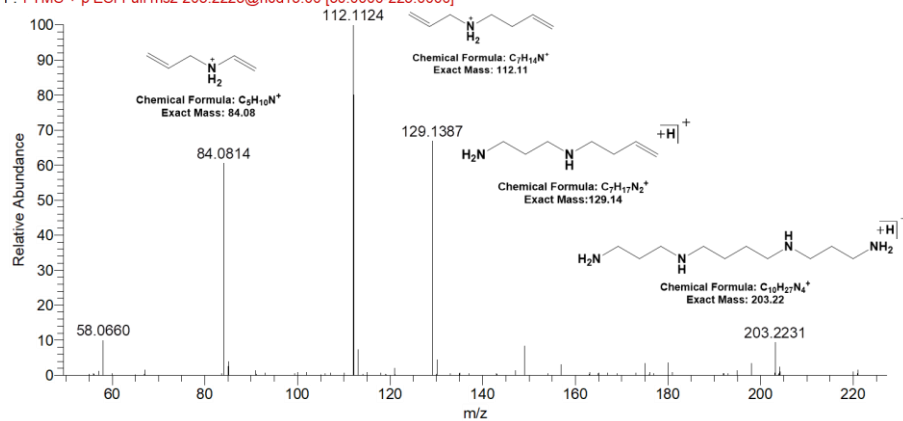

Supplementary Figure 56 | The MS/MS spectrum and the fragmentation pathway of spermine.

### Histidine

TUMOR-PRM-NEG1-15V-2 221116233731 #239 RT: 0.93 AV: 1 SB: 11 0.11-0.62 , 2.09-3.09 NL: 3.05E5  
F: FTMS - p ESI Full ms2 154.0622@hcd15.00 [50.0000-175.0000]

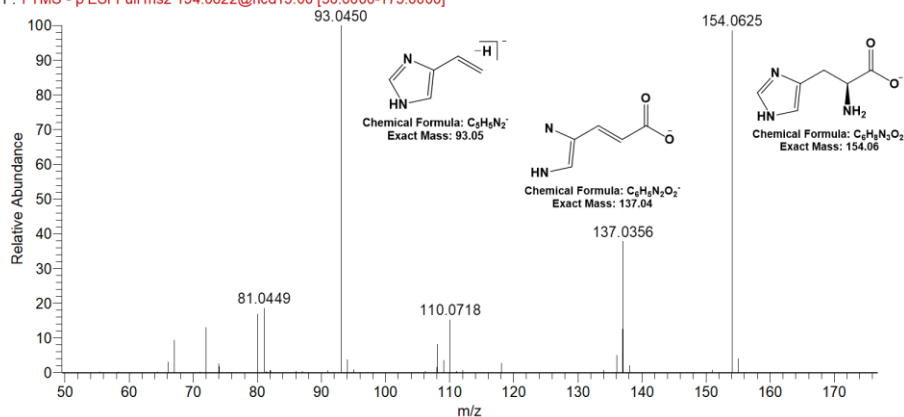

Supplementary Figure 57 | The MS/MS spectrum and the fragmentation pathway of histidine.

### Arginine

TUMOR-PRM-POS1 #298 RT: 1.07 AV: 1 SB: 7 0.41-0.72, 1.94-2.66 NL: 2.01E7  
F: FTMS + p ESI Full ms2 175.1190@hcd15.00 [50.0000-200.0000]

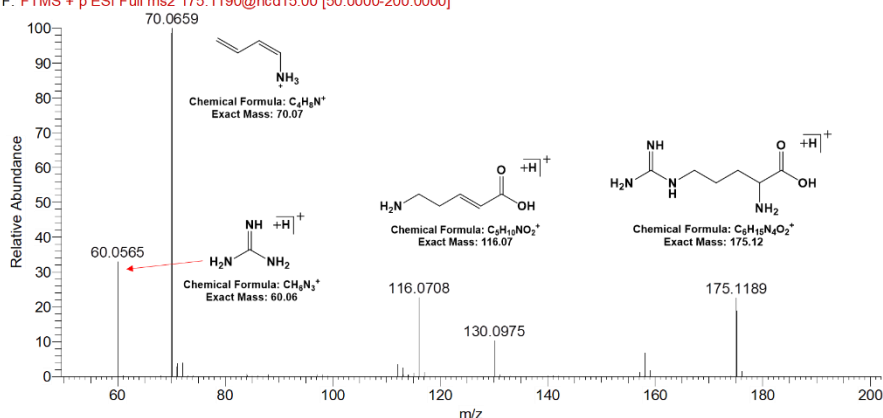

Supplementary Figure 58 | The MS/MS spectrum and the fragmentation pathway of arginine.

### Phenylalanine

TUMOR-PRM-NEG1-15V-2 #814-870 RT: 2.83-2.96 AV: 2 SB: 12 1.59-2.20, 4.66-5.53 NL: 1.90E6  
F: FTMS - p ESI Full ms2 164.0706@hcd15.00 [50.0000-185.0000]

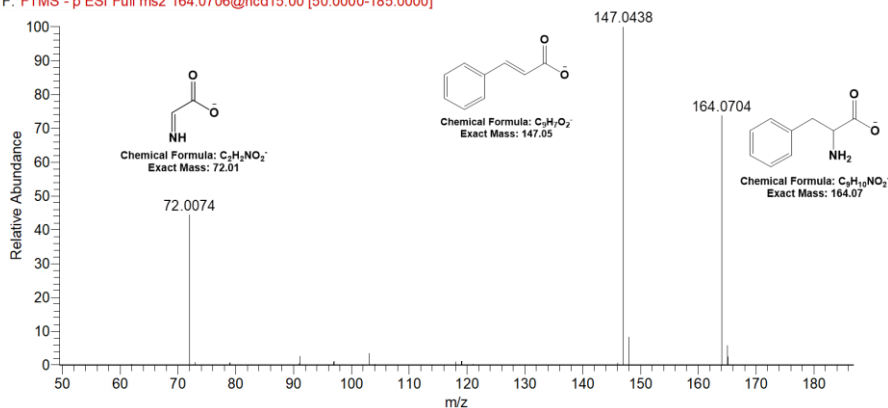

Supplementary Figure 59 | The MS/MS spectrum and the fragmentation pathway of phenylalanine.

### Phosphocholine

TUMOR-PRM-POS1 #302 RT: 1.07 AV: 1 SB: 5 0.42-0.71, 1.83-2.26 NL: 2.59E7  
F: FTMS + p ESI Full ms2 184.0733@hcd15.00 [50.0000-205.0000]

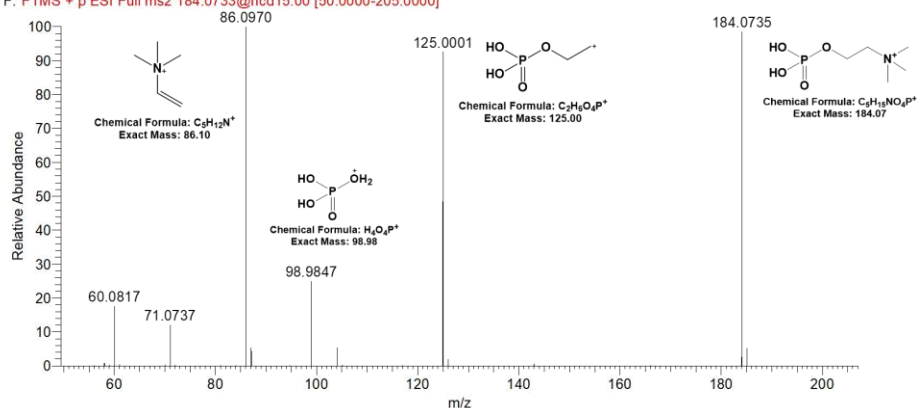

Supplementary Figure 60 | The MS/MS spectrum and the fragmentation pathway of phosphocholine.

### Glycerophosphocholine

TUMOR-PRM-POS1 #309 RT: 1.09 AV: 1 SB: 4 0.60-0.81 , 1.77-2.13 NL: 3.93E7  
F: FTMS + p ESI Full ms2 258.1101@hcd15.00 [50.0000-285.0000]

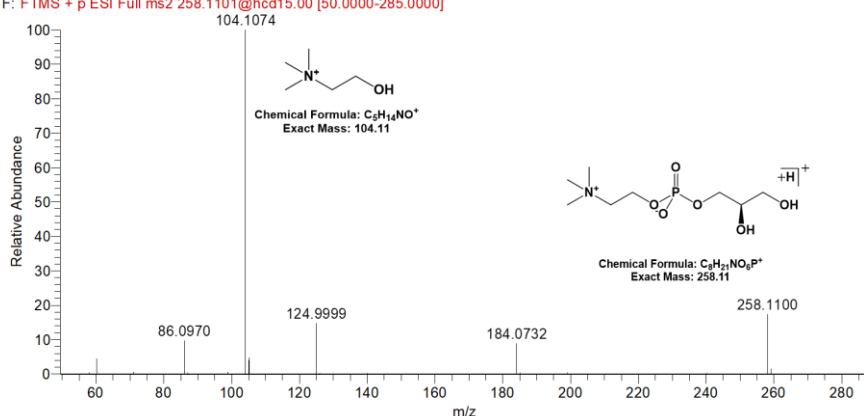

**Supplementary Figure 61 | The MS/MS spectrum and the fragmentation pathway of glycerophosphocholine.**

### FA-16:0

TUMOR-PRM-NEG2-40V #6355 RT: 22.47 AV: 1 SB: 11 21.17-21.74 , 23.93-24.61 NL: 1.11E5  
F: FTMS - p ESI Full ms2 255.2330@hcd40.00 [50.0000-280.0000]

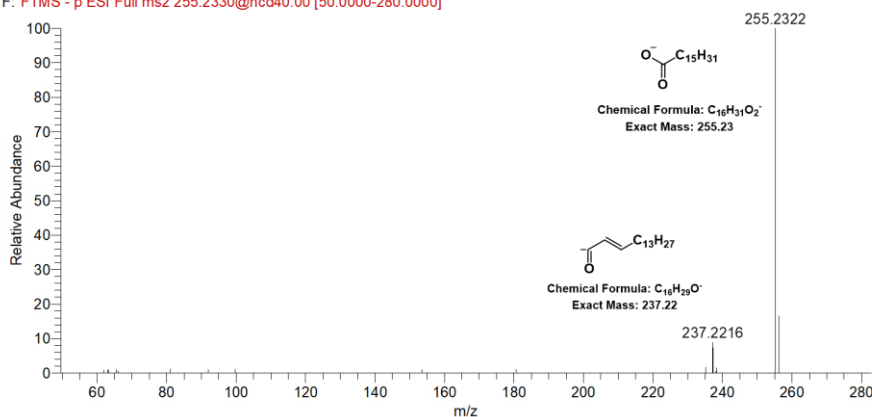

**Supplementary Figure 62 | The MS/MS spectrum and the fragmentation pathway of FA-16:0.**

### FA-18:2

TUMOR-PRM-NEG2-40V #6181-6260 RT: 21.79-22.01 AV: 3 SB: 20 20.12-21.21 , 22.80-23.93 NL: 2.21E4  
F: FTMS - p ESI Full ms2 279.2330@hcd40.00 [50.0000-305.0000]

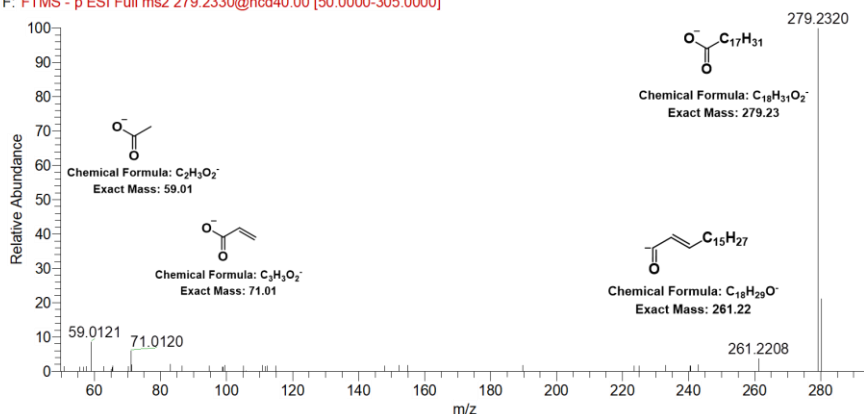

**Supplementary Figure 63 | The MS/MS spectrum and the fragmentation pathway of FA-18:2.**

FA-20:5

TUMOR-PRM-NEG2-25V #5901-5958 RT: 21.09-21.22 AV: 2 SB: 20 18.91-19.85 , 23.14-24.50 NL: 4.64E4  
F: FTMS - p ESI Full ms2 301.2173@hcd25.00 [50.0000-325.0000]

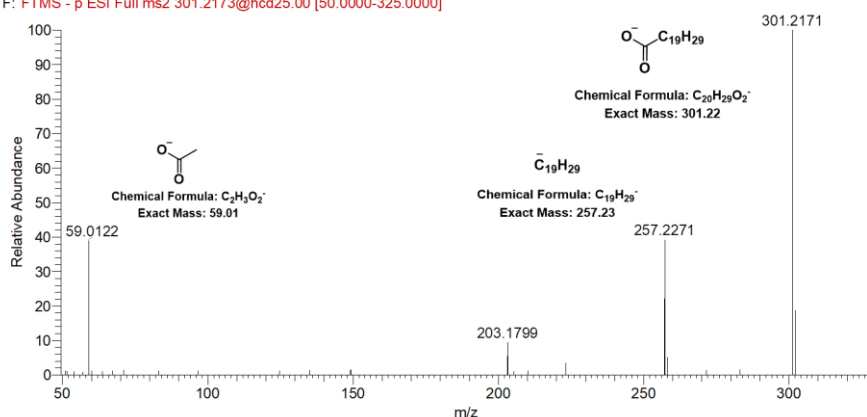

Supplementary Figure 64 | The MS/MS spectrum and the fragmentation pathway of FA-20:5.

FA-20:4

TUMOR-PRM-NEG2-25V #6055 RT: 21.73 AV: 1 SB: 14 19.78-20.69 , 22.72-23.70 NL: 2.30E6  
F: FTMS - p ESI Full ms2 303.2330@hcd25.00 [50.0000-330.0000]

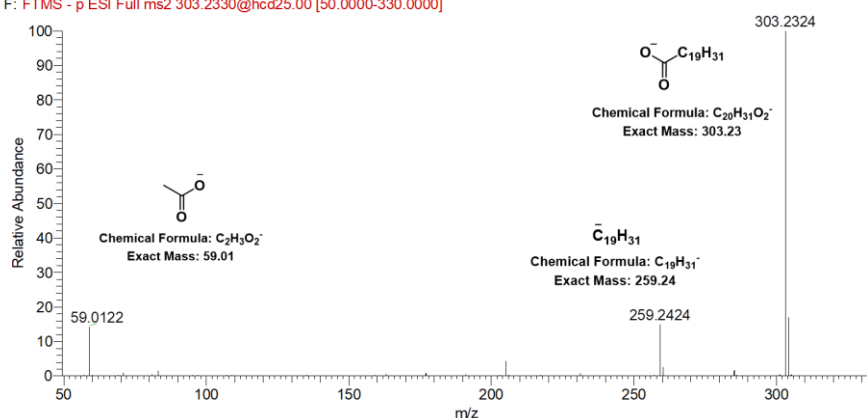

Supplementary Figure 65 | The MS/MS spectrum and the fragmentation pathway of FA-20:4.

FA-22:6

TUMOR-PRM-NEG2-25V #5986-6045 RT: 21.50-21.62 AV: 2 SB: 17 19.29-20.49 , 23.02-23.89 NL: 2.26E5  
F: FTMS - p ESI Full ms2 327.2330@hcd25.00 [50.0000-355.0000]

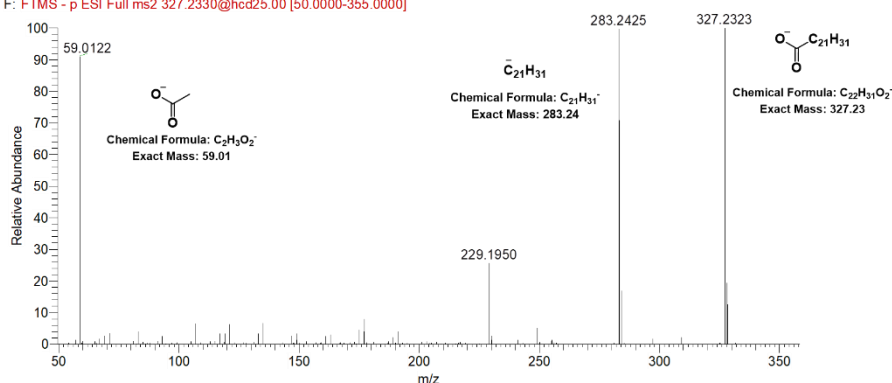

Supplementary Figure 66 | The MS/MS spectrum and the fragmentation pathway of FA-22:6.

FA-22:5

TUMOR-PRM-NEG2-25V #6105-6143 RT: 21.87-22.00 AV: 2 SB: 15 20.04-20.76 , 23.51-24.68 NL: 3.32E5  
F: FTMS - p ESI Full ms2 329.2486@hcd25.00 [50.0000-355.0000]

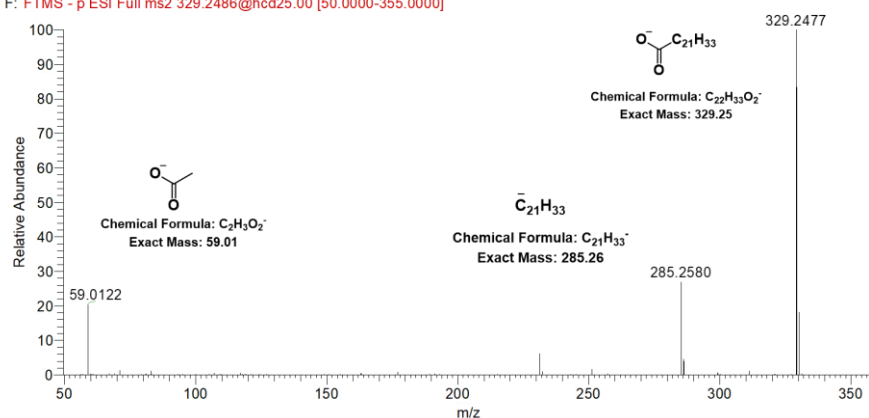

Supplementary Figure 67 | The MS/MS spectrum and the fragmentation pathway of FA-22:5.

Lyso PC-16:0

TUMOR-PRM-POS1 #3914 RT: 13.17 AV: 1 SB: 20 10.99-12.08 , 14.89-16.62 NL: 6.56E7  
F: FTMS + p ESI Full ms2 496.3398@hcd15.00 [50.0000-525.0000]

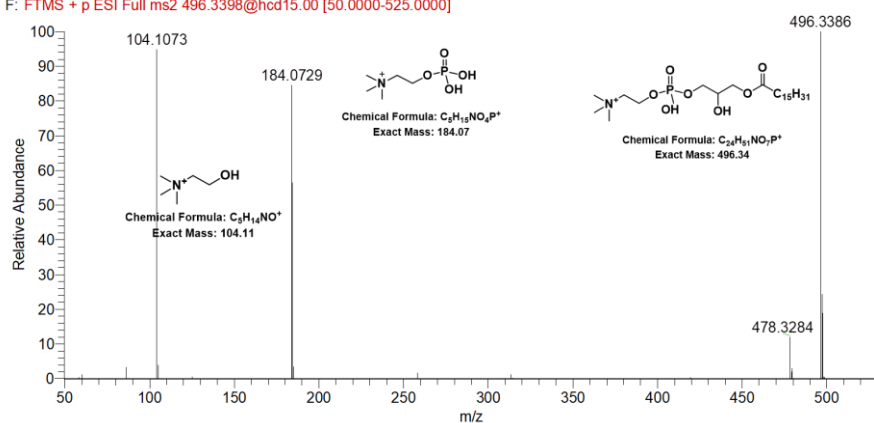

Supplementary Figure 68 | The MS/MS spectrum and the fragmentation pathway of lysoPC-16:0.

PC-32:0

TUMOR-L-POS1 #4330-4422 RT: 14.24-14.50 AV: 11 SB: 62 12.72-13.43 , 16.31-17.21 NL: 1.09E8  
F: FTMS + p ESI Full ms2 734.5694@hcd23.33 [51.3333-770.0000]

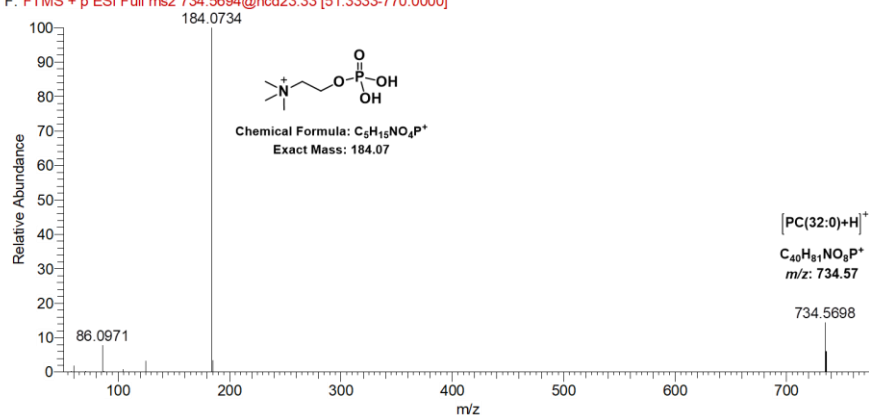

Supplementary Figure 69 | The MS/MS spectrum and the fragmentation pathway of PC-32:0.

PC-34:1

TUMOR-L-POS1 #4342-4411 RT: 14.27-14.48 AV: 9 SB: 87 12.12-13.21, 15.79-16.99 NL: 3.20E8  
F: FTMS + p ESI Full ms2 760.5851@hcd23.33 [53.0000-795.0000]

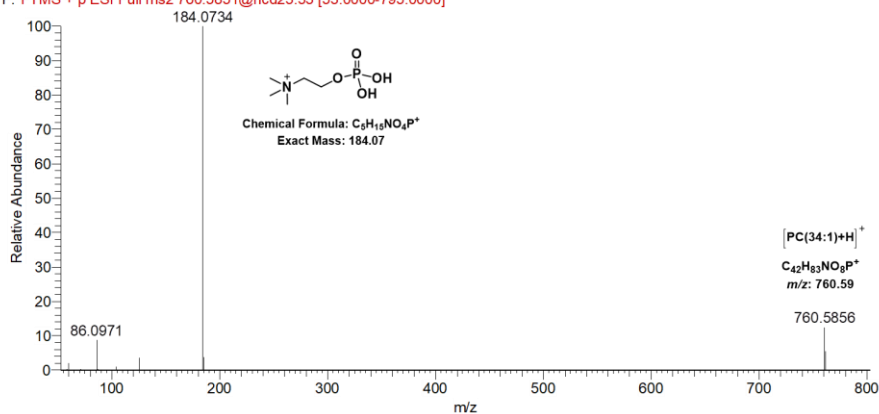

Supplementary Figure 70 | The MS/MS spectrum and the fragmentation pathway of PC-34:1.

PC-38:4

TUMOR-L-POS1 #4319-4365 RT: 14.18-14.31 AV: 6 SB: 77 12.16-12.87, 17.40-18.71 NL: 8.89E7  
F: FTMS + p ESI Full ms2 810.6007@hcd23.33 [56.3333-845.0000]

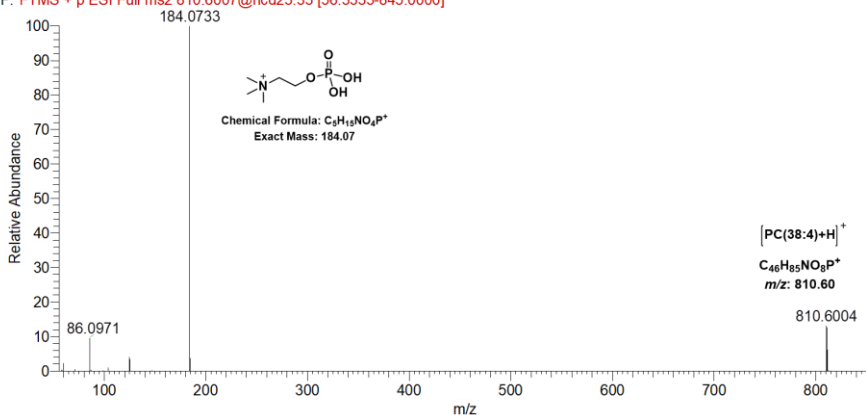

Supplementary Figure 71 | The MS/MS spectrum and the fragmentation pathway of PC-38:4.

PE-34:0

TUMOR-L-NEG1 #4302-4357 RT: 15.56-15.66 AV: 2 SB: 21 11.93-12.91, 16.61-17.96 NL: 3.12E5  
F: FTMS - p ESI Full ms2 718.5392@hcd25.00 [50.0000-750.0000]

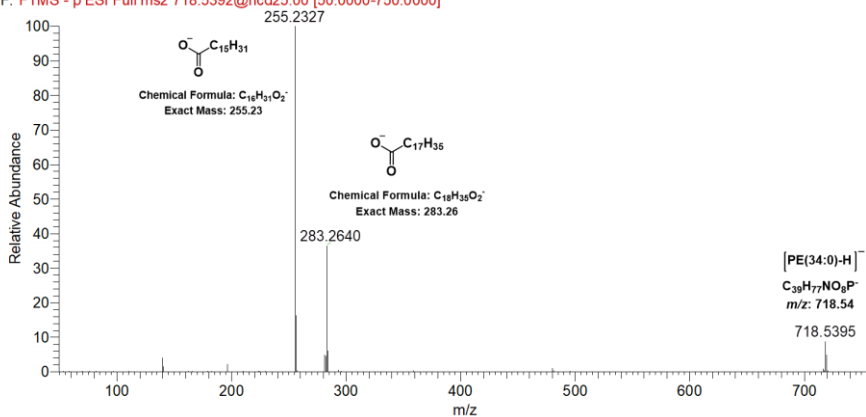

Supplementary Figure 72 | The MS/MS spectrum and the fragmentation pathway of PE-34:0.

PE-36:1

TUMOR-L-NEG1 #4302-4357 RT: 15.56-15.67 AV: 2 SB: 17 13.28-14.18 , 16.57-17.51 NL: 1.83E7  
F: FTMS - p ESI Full ms2 744.5549@hcd25.00 [52.0000-780.0000]

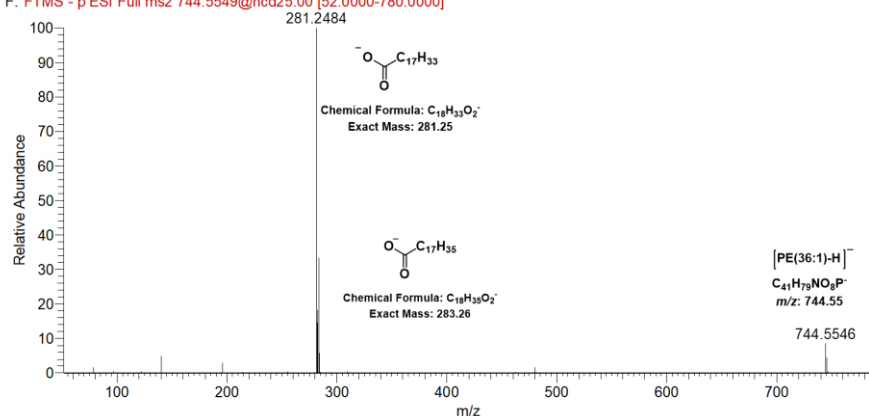

Supplementary Figure 73 | The MS/MS spectrum and the fragmentation pathway of PE-36:1.

PE-38:4

TUMOR-L-NEG1 #3980 RT: 14.49 AV: 1 SB: 19 11.49-12.72 , 16.05-16.99 NL: 1.09E7  
F: FTMS - p ESI Full ms2 766.5392@hcd25.00 [53.3333-800.0000]

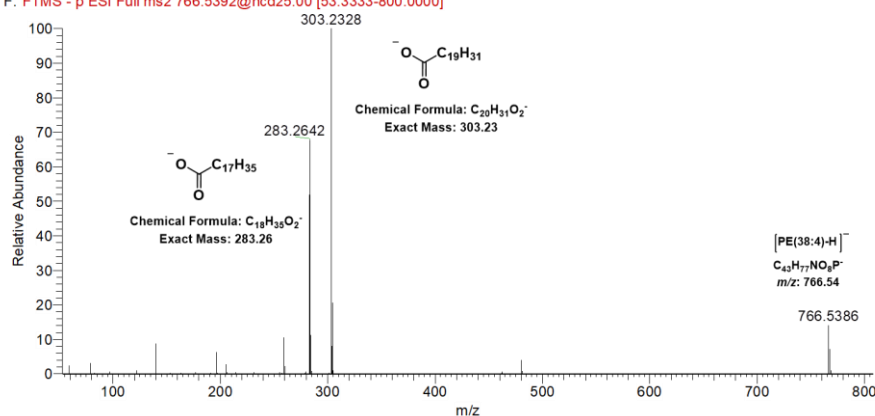

Supplementary Figure 74 | The MS/MS spectrum and the fragmentation pathway of PE-38:4.

Supplementary Table 1 | Annotated metabolites among the metabolic pathways analyzed in this study.

| Name         | Formula                                                      | Ion type           | Theoretical m/z | Measured m/z | Relative error (ppm) |
|--------------|--------------------------------------------------------------|--------------------|-----------------|--------------|----------------------|
| Choline      | C <sub>5</sub> H <sub>13</sub> NO                            | [M+H] <sup>+</sup> | 104.107         | 104.1066     | -3.85                |
| Histamine    | C <sub>5</sub> H <sub>9</sub> N <sub>3</sub>                 | [M+H] <sup>+</sup> | 112.0869        | 112.0865     | -3.57                |
| Proline      | C <sub>5</sub> H <sub>9</sub> NO <sub>2</sub>                | [M+H] <sup>+</sup> | 116.0706        | 116.0702     | -3.45                |
| Spermine     | C <sub>10</sub> H <sub>26</sub> N <sub>4</sub>               | [M+H] <sup>+</sup> | 203.2228        | 203.2225     | -1.48                |
| Spermidine   | C <sub>7</sub> H <sub>19</sub> N <sub>3</sub>                | [M+H] <sup>+</sup> | 146.1651        | 146.1648     | -2.05                |
| Arginine     | C <sub>6</sub> H <sub>14</sub> N <sub>4</sub> O <sub>2</sub> | [M+H] <sup>+</sup> | 175.119         | 175.1185     | -2.86                |
| L-Carnitine* | C <sub>7</sub> H <sub>15</sub> NO <sub>3</sub>               | [M+H] <sup>+</sup> | 162.1122        | 162.112      | -1.23                |
| Betaine*     | C <sub>5</sub> H <sub>11</sub> NO <sub>2</sub>               | [M+H] <sup>+</sup> | 118.0863        | 118.0860     | -2.54                |

|                       |                                                             |                    |          |          |       |
|-----------------------|-------------------------------------------------------------|--------------------|----------|----------|-------|
| Phosphocholine        | C <sub>5</sub> H <sub>14</sub> NO <sub>4</sub> P            | [M+H] <sup>+</sup> | 184.0733 | 184.0729 | -2.17 |
| Glycerophosphocholine | C <sub>8</sub> H <sub>20</sub> NO <sub>6</sub> P            | [M+H] <sup>+</sup> | 258.1101 | 258.1092 | -3.49 |
| Lyso PC-16:0          | C <sub>24</sub> H <sub>50</sub> NO <sub>7</sub> P           | [M+H] <sup>+</sup> | 496.3398 | 496.3386 | -2.42 |
| Lyso PC-18:0          | C <sub>26</sub> H <sub>54</sub> NO <sub>7</sub> P           | [M+H] <sup>+</sup> | 524.3711 | 524.3694 | -3.24 |
| Lyso PC-18:1          | C <sub>26</sub> H <sub>52</sub> NO <sub>7</sub> P           | [M+H] <sup>+</sup> | 522.3554 | 522.3538 | -3.06 |
| PC-32:0               | C <sub>40</sub> H <sub>80</sub> NO <sub>8</sub> P           | [M+H] <sup>+</sup> | 734.5694 | 734.5664 | -4.09 |
| PC-34:1               | C <sub>42</sub> H <sub>82</sub> NO <sub>8</sub> P           | [M+H] <sup>+</sup> | 760.5851 | 760.5815 | -4.74 |
| PC-34:2               | C <sub>42</sub> H <sub>80</sub> NO <sub>8</sub> P           | [M+H] <sup>+</sup> | 758.5694 | 758.5662 | -4.22 |
| PC-36:2               | C <sub>44</sub> H <sub>84</sub> NO <sub>8</sub> P           | [M+H] <sup>+</sup> | 786.6007 | 786.5981 | -3.31 |
| PC-38:4               | C <sub>46</sub> H <sub>84</sub> NO <sub>8</sub> P           | [M+H] <sup>+</sup> | 810.6007 | 810.5972 | -4.32 |
| Lactic acid           | C <sub>3</sub> H <sub>6</sub> O <sub>3</sub>                | [M-H] <sup>-</sup> | 89.0244  | 89.0240  | -4.49 |
| Taurine               | C <sub>2</sub> H <sub>7</sub> NO <sub>3</sub> S             | [M-H] <sup>-</sup> | 124.0074 | 124.0068 | -4.84 |
| Malic acid            | C <sub>4</sub> H <sub>5</sub> O <sub>5</sub>                | [M-H] <sup>-</sup> | 133.0142 | 133.0136 | -4.51 |
| Hypoxanthine          | C <sub>5</sub> H <sub>4</sub> N <sub>4</sub> O              | [M-H] <sup>-</sup> | 135.0312 | 135.0306 | -4.44 |
| Glutamate             | C <sub>5</sub> H <sub>9</sub> NO <sub>4</sub>               | [M-H] <sup>-</sup> | 146.0459 | 146.0452 | -4.79 |
| Histidine             | C <sub>6</sub> H <sub>9</sub> N <sub>3</sub> O <sub>2</sub> | [M-H] <sup>-</sup> | 154.0622 | 154.0615 | -4.55 |
| Phenylalanine         | C <sub>9</sub> H <sub>11</sub> NO <sub>2</sub>              | [M-H] <sup>-</sup> | 164.0706 | 164.0709 | 1.83  |
| Glucose-phosphate     | C <sub>6</sub> H <sub>13</sub> O <sub>9</sub> P             | [M-H] <sup>-</sup> | 259.0224 | 259.0217 | -2.70 |
| FA-16:1               | C <sub>16</sub> H <sub>30</sub> O <sub>2</sub>              | [M-H] <sup>-</sup> | 253.2173 | 253.2163 | -3.95 |
| FA-18:1               | C <sub>18</sub> H <sub>34</sub> O <sub>2</sub>              | [M-H] <sup>-</sup> | 281.2486 | 281.2473 | -4.63 |
| FA-20:1               | C <sub>20</sub> H <sub>38</sub> O <sub>2</sub>              | [M-H] <sup>-</sup> | 309.2799 | 309.2785 | -4.53 |
| FA-22:1               | C <sub>22</sub> H <sub>42</sub> O <sub>2</sub>              | [M-H] <sup>-</sup> | 337.3112 | 337.3096 | -4.75 |
| FA-24:1               | C <sub>14</sub> H <sub>26</sub> O <sub>2</sub>              | [M-H] <sup>-</sup> | 365.3425 | 365.3408 | -4.66 |
| FA-16:0               | C <sub>16</sub> H <sub>32</sub> O <sub>2</sub>              | [M-H] <sup>-</sup> | 255.2330 | 255.2319 | -4.31 |
| FA-18:0               | C <sub>18</sub> H <sub>36</sub> O <sub>2</sub>              | [M-H] <sup>-</sup> | 283.2643 | 283.2630 | -4.59 |
| FA-20:0               | C <sub>20</sub> H <sub>40</sub> O <sub>2</sub>              | [M-H] <sup>-</sup> | 311.2956 | 311.2942 | -4.50 |
| FA-22:5               | C <sub>22</sub> H <sub>34</sub> O <sub>2</sub>              | [M-H] <sup>-</sup> | 329.2486 | 329.2471 | -4.56 |
| FA-22:6               | C <sub>22</sub> H <sub>32</sub> O <sub>2</sub>              | [M-H] <sup>-</sup> | 327.2330 | 323.2317 | -3.96 |
| FA-20:5               | C <sub>20</sub> H <sub>30</sub> O <sub>2</sub>              | [M-H] <sup>-</sup> | 301.2173 | 301.2161 | -3.99 |
| FA-18:2               | C <sub>18</sub> H <sub>32</sub> O <sub>2</sub>              | [M-H] <sup>-</sup> | 279.2330 | 279.2317 | -4.66 |
| FA-20:4               | C <sub>20</sub> H <sub>32</sub> O <sub>2</sub>              | [M-H] <sup>-</sup> | 303.2330 | 303.2320 | -3.30 |
| PE-36:2               | C <sub>41</sub> H <sub>78</sub> NO <sub>8</sub> P           | [M-H] <sup>-</sup> | 742.5392 | 742.5377 | -2.02 |
| PE-36:1               | C <sub>41</sub> H <sub>80</sub> NO <sub>8</sub> P           | [M-H] <sup>-</sup> | 744.5549 | 744.5518 | -4.17 |

|             |                                                    |                    |          |          |       |
|-------------|----------------------------------------------------|--------------------|----------|----------|-------|
| PE-34:1     | C <sub>39</sub> H <sub>76</sub> NO <sub>8</sub> P  | [M-H] <sup>-</sup> | 716.5235 | 716.5215 | -2.79 |
| PE-34:0     | C <sub>39</sub> H <sub>78</sub> NO <sub>8</sub> P  | [M-H] <sup>-</sup> | 718.5392 | 718.5360 | -4.46 |
| PE-38:6     | C <sub>43</sub> H <sub>74</sub> NO <sub>8</sub> P  | [M-H] <sup>-</sup> | 762.5079 | 762.5066 | -1.71 |
| PE-38:4     | C <sub>43</sub> H <sub>78</sub> NO <sub>8</sub> P  | [M-H] <sup>-</sup> | 766.5392 | 766.5375 | -2.22 |
| PI-36:4     | C <sub>45</sub> H <sub>79</sub> O <sub>13</sub> P  | [M-H] <sup>-</sup> | 857.5186 | 857.5160 | -3.03 |
| PI-38:5     | C <sub>47</sub> H <sub>81</sub> O <sub>13</sub> P  | [M-H] <sup>-</sup> | 883.5342 | 883.5314 | -3.17 |
| PI-38:4     | C <sub>47</sub> H <sub>83</sub> O <sub>13</sub> P  | [M-H] <sup>-</sup> | 885.5499 | 885.5479 | -2.26 |
| PI-36:1     | C <sub>45</sub> H <sub>85</sub> O <sub>13</sub> P  | [M-H] <sup>-</sup> | 863.5655 | 863.5651 | -0.46 |
| PI-34:1     | C <sub>43</sub> H <sub>81</sub> O <sub>13</sub> P  | [M-H] <sup>-</sup> | 835.5342 | 835.5316 | -3.11 |
| PS-36:2     | C <sub>42</sub> H <sub>78</sub> NO <sub>10</sub> P | [M-H] <sup>-</sup> | 786.5291 | 786.5277 | -1.78 |
| PS-36:1     | C <sub>42</sub> H <sub>80</sub> NO <sub>10</sub> P | [M-H] <sup>-</sup> | 788.5447 | 788.5430 | -2.16 |
| PS-38:4     | C <sub>44</sub> H <sub>78</sub> NO <sub>10</sub> P | [M-H] <sup>-</sup> | 810.5291 | 810.5263 | -3.46 |
| PS-38:6     | C <sub>44</sub> H <sub>74</sub> NO <sub>10</sub> P | [M-H] <sup>-</sup> | 806.4978 | 806.4951 | -3.35 |
| PG-38:4     | C <sub>44</sub> H <sub>79</sub> O <sub>10</sub> P  | [M-H] <sup>-</sup> | 797.5338 | 797.5301 | -4.64 |
| PG-38:5     | C <sub>44</sub> H <sub>77</sub> O <sub>10</sub> P  | [M-H] <sup>-</sup> | 795.5182 | 795.5156 | -3.27 |
| PG-38:3     | C <sub>44</sub> H <sub>81</sub> O <sub>10</sub> P  | [M-H] <sup>-</sup> | 799.5495 | 799.5482 | -1.63 |
| PG-36:4     | C <sub>42</sub> H <sub>75</sub> O <sub>10</sub> P  | [M-H] <sup>-</sup> | 769.5025 | 769.5010 | -1.95 |
| C24:1-OH-ST | C <sub>48</sub> H <sub>91</sub> NO <sub>12</sub> S | [M-H] <sup>-</sup> | 904.6189 | 904.6180 | -0.99 |
| C24:0-OH-ST | C <sub>48</sub> H <sub>93</sub> NO <sub>12</sub> S | [M-H] <sup>-</sup> | 906.6346 | 906.6324 | -2.42 |
